RESEARCH ARTICLE

# Molecular markers in keratins from Mysticeti whales for species identification of baleen in museum and archaeological collections

Caroline Solazzo<sup>1\*</sup>, William Fitzhugh<sup>2</sup>, Susan Kaplan<sup>3</sup>, Charles Potter<sup>4</sup>, Jolon M. Dyer<sup>5</sup>

**1** Museum Conservation Institute, Museum Support Center, Smithsonian Institution, Suitland, Maryland, United States of America, **2** Arctic Studies Center, National Museum of Natural History, Department of Anthropology MRC 112, Smithsonian Institution, Washington D.C., United States of America, **3** The Peary-MacMillan Arctic Museum and Arctic Studies Center, Bowdoin College, Brunswick, Maine, United States of America, **4** Department of Vertebrate Zoology, Division of Mammals, National Museum of Natural History, MRC 108, Smithsonian Institution, Washington DC, United States of America, **5** Food & Bio-Based Products, AgResearch, Lincoln Research Centre, Christchurch, New Zealand

\* [solazzoc@si.edu](mailto:solazzoc@si.edu), [solazzo.c@gmail.com](mailto:solazzo.c@gmail.com)

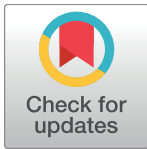

## Abstract

Baleen has been harvested by indigenous people for thousands of years, as well as collected by whalers as an additional product of commercial whaling in modern times. Baleen refers to the food-filtering system of Mysticeti whales; a full baleen rack consists of dozens of plates of a tough and flexible keratinous material that terminate in bristles. Due to its properties, baleen was a valuable raw material used in a wide range of artefacts, from implements to clothing. Baleen is not widely used today, however, analyses of this biomolecular tissue have the potential to contribute to conservation efforts, studies of genetic diversity and a better understanding of the exploitation and use of Mysticeti whales in past and recent times. Fortunately, baleen is present in abundance in museum natural history collections. However, it is often difficult or impossible to make a species identification of manufactured or old baleen. Here, we propose a new tool for biomolecular identification of baleen based on its main structural component alpha-keratin (the same protein that makes up hair and fingernails). With the exception of minke whales, alpha-keratin sequences are not yet known for baleen whales. We therefore used peptide mass fingerprinting to determine peptidic profiles in well documented baleen and evaluated the possibility of using this technique to differentiate species in baleen samples that are not adequately identified or are unidentified. We examined baleen from ten different species of whales and determined molecular markers for each species, including species-specific markers. In the case of the Bryde's whales, differences between specimens suggest distinct species or sub-species, consistent with the complex phylogeny of the species. Finally, the methodology was applied to 29 fragments of baleen excavated from archaeological sites in Labrador, Canada (representing 1500 years of whale use by prehistoric people), demonstrating a dominance of bowhead whale (*Balaena mysticetus*) in the archaeological assemblage and the successful application of the peptide mass fingerprinting technique to identify the species of whale in unidentified and partially degraded samples.

## OPEN ACCESS

**Citation:** Solazzo C, Fitzhugh W, Kaplan S, Potter C, Dyer JM (2017) Molecular markers in keratins from Mysticeti whales for species identification of baleen in museum and archaeological collections. PLoS ONE 12(8): e0183053. <https://doi.org/10.1371/journal.pone.0183053>

**Editor:** Dong Hoon Shin, Seoul National University College of Medicine, REPUBLIC OF KOREA

**Received:** December 21, 2016

**Accepted:** July 30, 2017

**Published:** August 30, 2017

**Copyright:** This is an open access article, free of all copyright, and may be freely reproduced, distributed, transmitted, modified, built upon, or otherwise used by anyone for any lawful purpose. The work is made available under the [Creative Commons CC0](https://creativecommons.org/licenses/by/4.0/) public domain dedication.

**Data Availability Statement:** All relevant data are within the paper and its Supporting Information files.

**Funding:** The analytical work was supported by a Burch Fellowship in Theoretical Medicine and Affiliated Sciences (Smithsonian Institution). Caroline Solazzo-2014 recipient: <https://www.smithsonianof.com/fellowship-opportunities/george-e-burch-fellowship/>. The funder provided support in the form of salaries for authors [CS], but did not have any additional role in the study design,

data collection and analysis, decision to publish, or preparation of the manuscript. The specific roles of these authors are articulated in the 'author contributions' section. Jolon Dyer employed at the company AgResearch Ltd served as adviser and contributed to the preparation of the manuscript.

**Competing interests:** The authors have declared that no competing interests exist. Jolon Dyer employed at the company AgResearch Ltd served as adviser and contributed to the preparation of the manuscript. His affiliation does not alter our adherence to PLOS ONE policies on sharing data and materials.

## Introduction

Beginning in the 1990s, museum collections and in particular natural history specimens have become important resources to address questions of evolution, lineages and population genetics, as well as issues linked to ecology, responses to climate change, conservation, loss of genetic diversity and population declines [1–6]. Advances in genetics (e.g., high-throughput sequencing) have allowed for the recovery of maximum amounts of genetic data from minimal sample sizes, thus helping address issues of DNA degradation and contamination in ancient or damaged specimens [1, 3, 4, 6–8]. Genetic material has been retrieved from a variety of tissues from museum specimens: bones and teeth, plant tissues, insects, feathers and skins [1]. DNA has also been successfully recovered from baleen plates, some over a hundred years old [9, 10], and from historical [11] and archaeological [12, 13] artefacts fashioned from baleen. This work has shown that analyses of baleen can contribute to studies of population genetics, conservation and exploitation and use of Mysticeti whales in past and recent times. However, studies have also suggested a significant degradation of DNA (in particular nuclear DNA) in historical baleen compared to fresh specimens [8, 14].

Baleen refers to the food-filtering apparatus of Mysticeti whales [15] (taxonomy in [S1 File](#)): a full baleen rack consists of dozens of plates (thin sheets packed with longitudinal tubules and covered with a layer of horn-like material) made of a tough and flexible keratinous material [15–17]. The plates are terminated by bristles, resulting when the horn cover is worn out and the tubules exposed ([Fig 1](#)). Recently, interesting venues of research have been developed using the growth pattern of baleen plates. Baleen is formed continually and is worn out at the tip over years or decades; for species with particularly long plates such as right and bowhead whales, the length of a plate can represent up to 25 years of the life of an animal. This characteristic is being used to study stress-related factors affecting whales and their reproductive hormone levels over time, for example to document pregnancies [18, 19]. Thus there is the possibility that physiological stresses due to climate change and changing environmental conditions could be assessed in modern whale populations and compared to ancient specimens whose plates are stored in museum collections [19]. In combination with isotope readings along the plate, whale migration patterns could be determined, as could diet and the location of feeding grounds [20].

## Historical and cultural importance of baleen whales

**Baleen in material culture.** Mysticeti whales are ubiquitous around the world; there are currently 14 species of listed baleen whales (Table A in [S1 File](#)). Some species (sei, blue, fin,

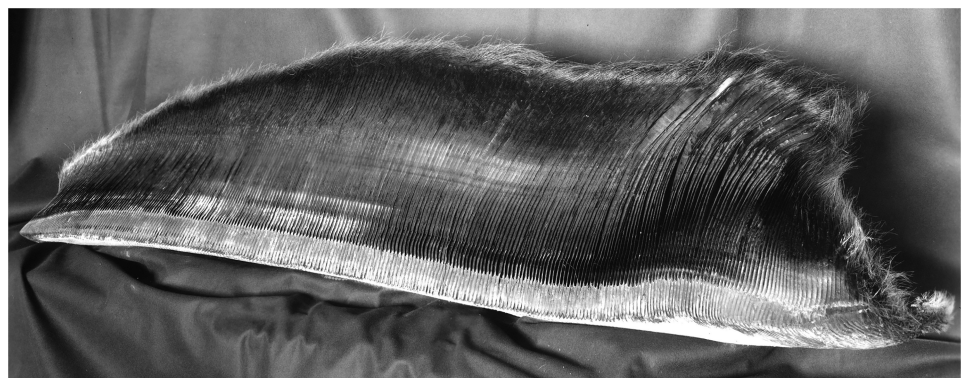

**Fig 1. Baleen rack of specimen USNM 267999, an 11 m humpback whale (*Megaptera novaeangliae*) collected in Western Australia, 1938.**

<https://doi.org/10.1371/journal.pone.0183053.g001>

minke and humpback) have nearly worldwide distributions while others are adapted to specific ecosystems; for instance the Bryde's whale inhabits the tropical and subtropical latitudes and the bowhead whale the northern circumpolar regions. While evidence of prehistoric whaling has been found around the globe [21, 22] (for example in Indonesia [23], Japan [24], Norway, Scotland and Iceland [25]), indigenous whale hunting has been of particular importance for the Arctic and North Pacific where traditional hunting of large whales has been practiced for over 4000 years and stranded whales have likely been harvested for thousands of years [26–29]. Prehistorically, baleen was collected along with the bones, meat and blubber of a whale. A number of Arctic cultures fashioned baleen into fishing and hunting implements (buckets, ice scoops, bows, sled runners, fish lines, lashings, nets, snares), clothing (boot insulation) and other artefacts [30–32], and today baleen is incorporated into Alaskan Iñupiat and Yup'ik artwork and fashioned into baskets. In Japan some baleen artefacts date back to the 8<sup>th</sup> c. [33], and more recently baleen has been used to make tea trays, decorative elements such as the wrapping of swords and puppet springs [31].

Elsewhere, there is little known about traditions of baleen use, even though whale remains and artefacts made of whale bones have been found in many archaeological sites (for instance in Northern Europe [34–37], South America [38] and New Zealand [39, 40]). In the United Kingdom for example, only two archaeological finds of baleen are known [41]. This is likely due to the poorer preservation of keratinous tissues in warm and temperate climates compared to bone. Bone is tightly packed with collagenous fibrils and is highly mineralized (50–70%). The inorganic component of baleen is much lower than in bone; in sei whales, for example, the hydroxyapatite content has been estimated at only 4.5% [42]. Without the protective mineral component, baleen, like other keratinous tissues, would be susceptible to biodegradation [41].

Baleen becomes more conspicuous in material culture associated with commercial whaling by Europeans and later by Americans. Due to its tough and flexible properties, the material was used for a wide range of objects and acquired a high commercial value. As early as the 13<sup>th</sup> c. A.D., baleen was used in Europe in the construction of armor and tourney equipment [41]. During the 18<sup>th</sup> and 19<sup>th</sup> c. A.D., when exploitation of baleen was at its maximum, the plastic material was made into sheets, strips or rods and used in items of clothing (stays, corsets and hoop skirts) [43], and in the production of objects such as umbrella stays, eyeglass frames, combs, boxes, etc. [31, 41, 43].

**Exploitation of baleen whales.** Most archaeological sites containing whale bones are found in the northern hemisphere and right and bowhead whales have been considered to have been the most targeted species. It is usually associated with prehistoric and historic Iñupiat, Thule and Inuit sites [44–46]; for instance bowhead whale bones are found in abundance in Alaska and central Canada, where prehistoric Inuit used them as house supports [44, 47]. It was hunted in the Eastern Arctic, and together with the humpback whale, was taken in Greenland by early Greenlandic whalers [21]. Archaeological sites along the Pacific Northwest Coast (where whale use has been demonstrated for at least 4,000 years [48, 49]) have yielded only a small proportion of right whale bones, while gray whale and humpback whale remains constitute almost the entirety of the bone assemblages of archaeological sites such as the Toquaht sites on Vancouver Island [48], the Ozette site in Washington State [50] and the Par-Tee site on the Oregon Coast [51]. The gray whale, whose range extends to the Chukchi Sea and Wrangel Island, was also hunted by Chukchi and Inuit in Russia [21] and in Japan [33]. With the invention of net whaling in the second half of the 17<sup>th</sup> c. in Japan, catching of the right whale was made easier and whaling intensified and extended to humpback, Bryde's, minke, fin and blue whales [33].

In pre-modern whaling, right, bowhead and gray whales were favored by European and American whalers as they were slower swimmers than other whales, produced large amounts

of oil and could be killed with hand-thrown harpoons and lances ([52], p600). For example, the right whale was named so because it inhabits coastal waters, is a slower swimmer than other mysticetes and floats when dead—i.e., it was the “right” whale to catch ([52], p77). When Basque whaling started in the 11<sup>th</sup> c. (French Basque country in the Bay of Biscay) and the 12<sup>th</sup> c. (Spanish Basque country) the North Atlantic right whale was mainly hunted during its winter southern migration [53]. Later on whaling by westerners moved to the North Atlantic, starting with the English Channel in the 14<sup>th</sup> c., Iceland in the 15<sup>th</sup> c., Norway and Svalbard in the 16<sup>th</sup> c and Greenland in the 17<sup>th</sup> c. At that point large numbers of bowhead whales were caught in addition to the right whale [43]. European whaling expanded to the coasts of Newfoundland and Labrador in the 16<sup>th</sup> c. [54, 55] where recent genetic studies on 16<sup>th</sup> and 17<sup>th</sup> c. bones have shown that the Basques caught mostly bowhead and a few humpback whales and not the right whale as initially thought [56, 57].

It was not until the advent of power boats and harpoon guns ([52], p416) that the fast rorquals (*Balaenoptera* sp) were caught as well. The intensive whaling activity that ensued in the 19<sup>th</sup> and 20<sup>th</sup> c. have caused most species to be severely depleted and there is currently a debate about pre-commercial whaling population sizes. A better appreciation of the species hunted and the extent of whaling in specific geographical areas are needed for conservation purposes. In addition, knowledge about the species used prehistorically for their baleen could contribute to our understanding of various groups’ cultural traditions. Firm identification of the species represented in baleen specimens and baleen artefacts is a step towards these goals. Baleen plates vary in shape, size, thickness and color depending on the species (Table B in S1 File), but these features can be difficult to recognize once the material has been worked, cut or has degraded [31, 41]. Upon drying, baleen shrinks and becomes brittle (Fig 2), and the tubules become detached from the outer layer. Since the morphological characteristics of baleen have been altered in ancient baleen we turned to biomolecular techniques to develop a method of identifying the species of whale from which the ancient baleen was originally harvested.

## Peptide mass fingerprinting (PMF) of baleen

To address problems of species identification of unidentified museum specimens (resulting for example from outdated, inaccurate, absent or erroneous curatorial records), DNA barcoding was developed as a taxonomic tool. This method uses one or multiple short genetic sequences to identify a specimen or part of an animal and if possible connect it to a reference species, and has been used to describe new taxa [58–61]. However concerns have been raised about the accuracy of this method of analysis, such as species delimitation and availability of controlled reference specimens [61–64]. The idea that DNA barcoding can be used to describe new organisms and assess biodiversity based on a single locus has been criticized [65]. The proteomics equivalent to DNA barcoding, peptide mass fingerprinting (PMF), is different in that it targets whole proteins and relies on multiple peptide markers instead of a short DNA sequence. As in DNA barcoding though, it relies on well-characterized specimens for reference materials and has taxonomic limitations (identification up to the genus level for example). But PMF can be used to select ancient specimens for liquid chromatography-tandem mass spectrometry (LC-MS/MS) that will produce sufficient peptide sequences to establish molecular phylogeny (based on one type of protein, e.g., collagen [66]). Peptide mass fingerprinting is a rapid, accurate and efficient method for species identification of ancient artefacts, it requires little material and can provide results on processed and degraded material [41, 67, 68]. It has recently been used to study marine mammal remains, using collagen peptides in bones for species identification and to screen whale remains for biomolecule preservation in ancient deposits [36, 38, 69]. Species belonging to the same genus (*Balaenoptera* sp.) have PMFs distinct

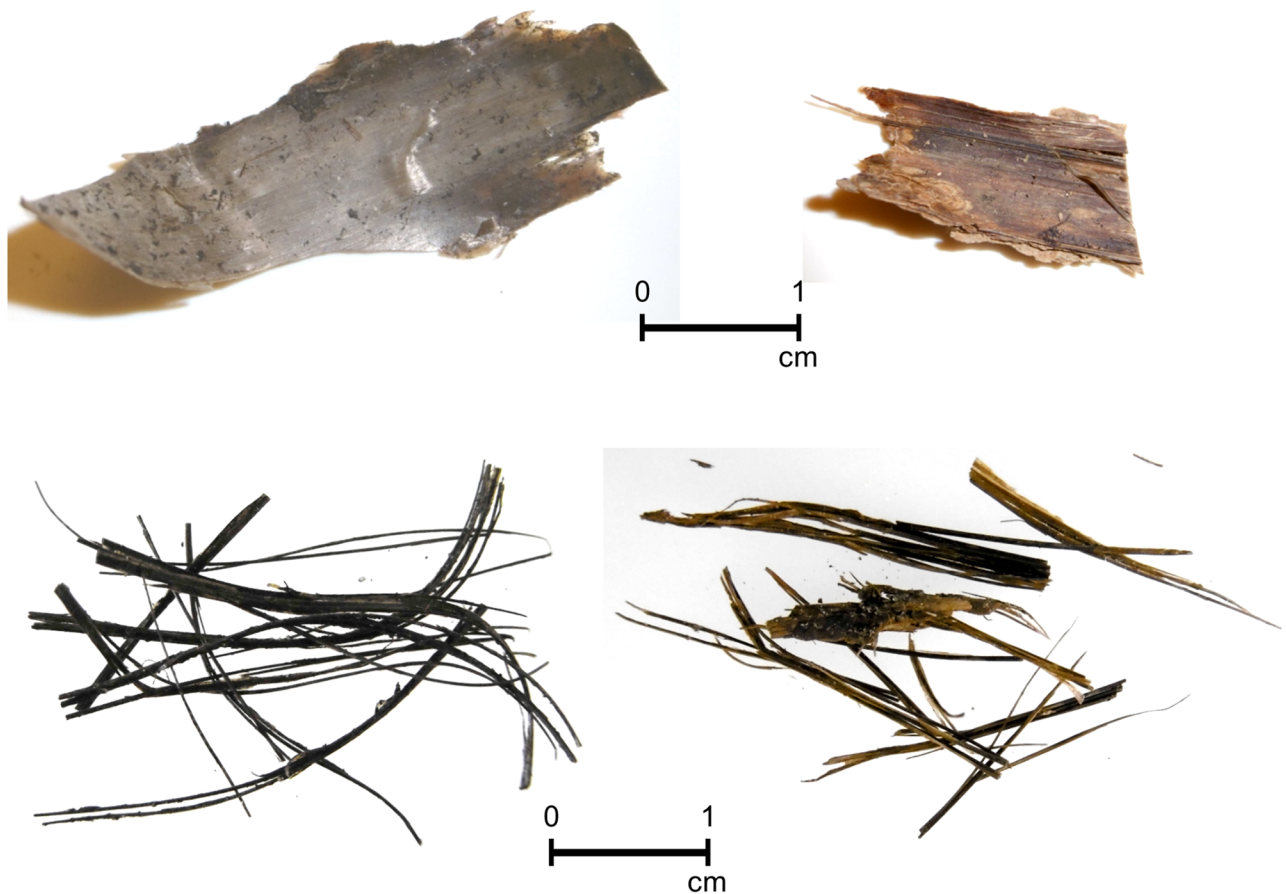

**Fig 2. Archaeological baleen from Labrador.** Left: Strip and bristles from Avayalik-1 (JaDb-10, 49A). Right: Strip and bristles from Johannes Point (IbCq-1).

<https://doi.org/10.1371/journal.pone.0183053.g002>

enough to identify those species in archaeological bones [36], which raises the interesting possibility that similar results could be obtained on baleen.

Baleen is made of alpha-keratin proteins, the same type found in hair and nail; the tubules are made of flattened keratinised cells packed with intermediate filaments ( $\alpha$ -keratins) in the length of the tubule and surrounded by a protein matrix. A preliminary study on baleen [70] found that the typical type I (acidic Ha) and type II (basic Hb) keratin proteins dominated the peptidic profile, and that this profile presented distinct peaks at similar positions to animal fibers. Based on variations in amino acid sequences across taxa, each PMF is however representative of the analyzed genus (and sometimes species). Here we use 27 specimens from the Smithsonian Institution's Museum of Natural History collection (acquired between 1879 to 1988) to determine markers of identification for 10 species of mysticeti whales (North Pacific right, North Atlantic right, bowhead, Bryde's, sei, blue, common minke, fin, humpback and gray whales). The Southern right whale (*Eubalaena australis*), the Pigmy right whale (*Caperea marginata*, belonging to its own distinct family), Omura's whale (*Balaenoptera omurai*) and the Antarctic minke whale (*Balaenoptera bonaerensis*) were not included in this study due to the lack of availability of suitable specimens. Species assignment of each specimen sampled was based on accession records, morphological characteristics of the plate and in some cases the whole rack; multiple specimens were sampled for each species whenever possible. The

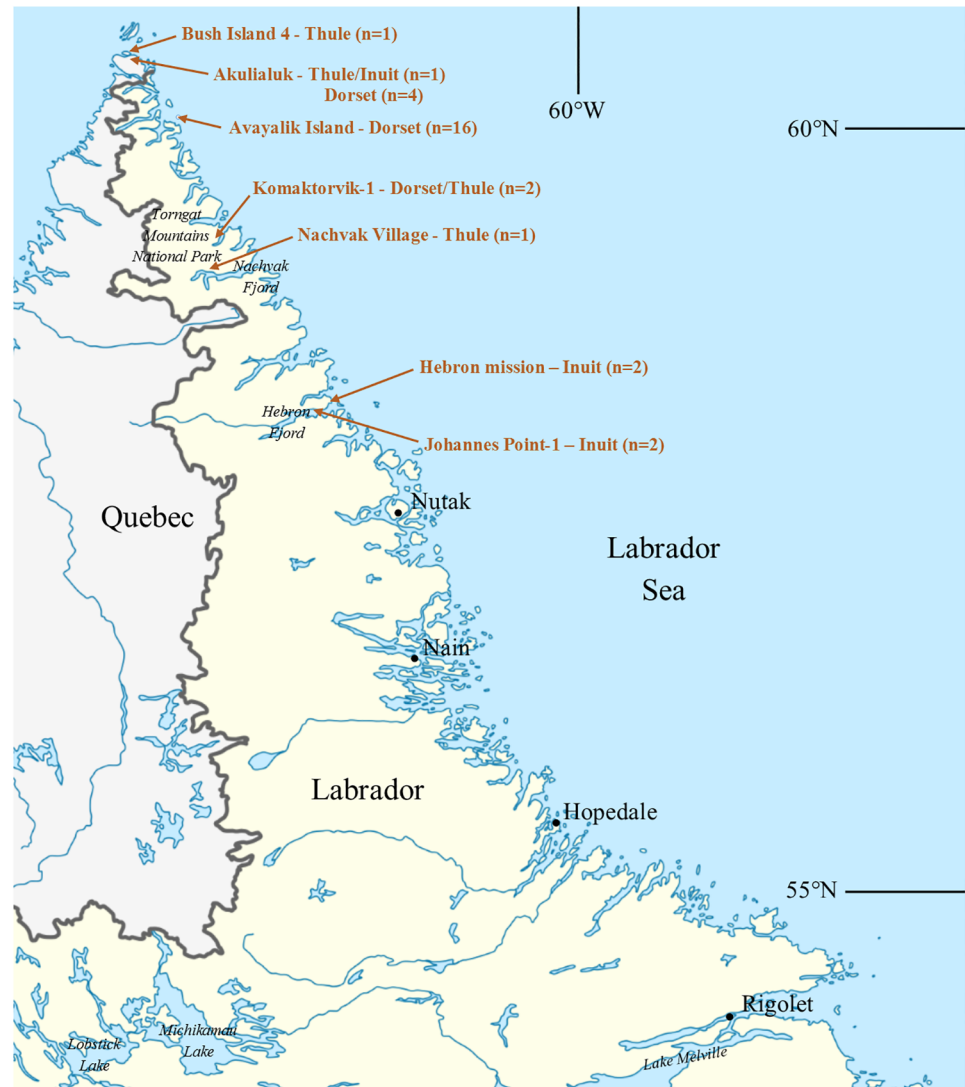

**Fig 3. Map of Labrador, Canada, modified from NordNordWest [CC BY-SA 3.0 (<http://creativecommons.org/licenses/by-sa/3.0>)], via Wikimedia Commons, and showing the location of the archaeological sites where baleen was found, as shown in Fitzhugh, 1980 [71].**

<https://doi.org/10.1371/journal.pone.0183053.g003>

methodology was applied to 29 archaeological baleen samples obtained from multiple sites in Labrador, Canada (Fig 3) spanning up to 1500 years of aboriginal use of whales, including both stranded and hunted individuals. Taxonomic identifications based on the formerly described morphological characteristics of baleen [41] were impossible due to the fragmentary state of the remains.

## Materials and methods

### Sample collection

Reference materials from *Eubalaena japonica* (one specimen, n = 1), *Eubalaena glacialis* (n = 2), *Balaena mysticetus* (n = 3), *Balaenoptera brydei/edeni* (n = 4), *Balaenoptera borealis* (n = 4), *Balaenoptera musculus* (n = 3), *Balaenoptera acutorostrata* (n = 1), *Balaenoptera*

*physalus* (n = 3), *Megaptera novaeangliae* (n = 3), *Eschrichtius robustus* (n = 3), were obtained from the Marine Mammals department at the Smithsonian Institution (Table 1). A permit for destructive sampling was obtained from the Division of Mammals of the National Museum of Natural History (NMNH). Samples were collected by drilling at the base (the side of the plates embedded in the jaw) where there was maximal thickness. The surfaces of the plates were cleaned with water and the first drilled layer was discarded. The second layer was then collected from one hole (two for thin plates) and placed into plastic vials. Another recent specimen (date and species unknown) was also obtained from AgResearch (Jeff Plowman, Proteins and Biomaterials group), Christchurch, New Zealand (unregistered specimen, no permit required for sampling) by scratching the surface with a razor blade (S2 File).

Archaeological baleen was sampled from plate strips (five samples) and bristles (24 samples) (details in Table A in S3 File), recovered from houses and middens excavated in 1977–1978 from sites attributed to different cultures (Fig 3): Dorset, ca. 1500 B.P. to 600 B.P. [71] (20 samples), Dorset/Thule (three samples), Thule, ca. A.D. 1500 [72, 73] (two samples), Thule/Inuit (one sample), and historic period Labrador Inuit, post A.D. 1800 (four samples). Since cataloguing in 1978 the samples have been stored in sealed plastic vials at the Arctic Studies Center, NMNH (no permits were required for the described study).

## Protein extraction

The fresh and archaeological samples of baleen were washed with water twice, (archaeological samples were sonicated for 10 seconds to remove dirt) followed by ethanol and left to dry. The samples were then cut into small pieces with a scissor cleaned with ethanol. Proteins were extracted by overnight shaking in a 0.5 ml solution of 8M urea, 50 mM Tris and 50 mM TCEP at pH 8.4. An aliquot of 100  $\mu$ L supernatant was alkylated for 45 min in the dark with 400 mM of iodoacetamide for a final concentration of 40 mM. The samples were dialysed overnight with 100 mM ammonium bicarbonate in 2 kDa molecular weight cut-off (MWCO) dialysis units (Slide-A-Lyzer<sup>™</sup> MINI Dialysis Devices by Thermo Scientist). The samples were then digested with 0.5  $\mu$ g of trypsin, for 18 h at 37°C, dried down in the morning and resuspended in 100  $\mu$ L of 0.1% trifluoroacetic acid (TFA) before solid phase extraction with 3M Empore<sup>™</sup> Octadecyl C18 extraction disk (Supelco, Bellefonte PA, USA), cut into 2 x 2 mm pieces. The proteins were extracted by shaking for 3 hours, the Empore cuts washed with 0.1% formic acid and proteins eluted with a solution of 75%/25% acetonitrile/formic acid, dried down and resuspended in 10  $\mu$ L of 0.1% trifluoroacetic acid. The samples were spotted on AnchorChip<sup>™</sup> target (Bruker) as previously described [70].

## Peptide mass fingerprinting by MALDI-TOF-MS

Analyses were carried out with an Ultraflex<sup>™</sup> III mass spectrometer (Bruker), in positive reflector mode using a Nd:YAG laser operating at 355 nm. Spectra were acquired using flexControl 3.0 (Bruker) on a mass range of 700–3,500 Da with an accumulation of 500 shots on the standards and 1000 shots on the samples. The calibration standard (Bruker) was prepared according to the manufacturer's instructions for instrument calibration and consisted of angiotensin I, ACTH clip(1–17), ACTH clip (18–39) and ACTH clip(7–38) peptides.

## Data analysis

The spectra were processed with mMass 5.5.0 (<http://www.mmass.org/>) after conversion of the raw files with flexanalysis 3.3 (Bruker). Spectra were smoothed with Gaussian filter (width 0.3  $m/z$ ) and internally recalibrated using the peptides identified in Table 2, for an error after calibration of  $\leq 0.02$  Da.

**Table 1. Details of specimens sampled and quantity of baleen analysed.**

| Accession #            | Scientific name                   | Common name          | Collection date  | Collection location                                                                                              | Mass tested (mg) |
|------------------------|-----------------------------------|----------------------|------------------|------------------------------------------------------------------------------------------------------------------|------------------|
| Balaenidae family      |                                   |                      |                  |                                                                                                                  |                  |
| USNM 339990            | <i>Eubalaena japonica</i>         | Pacific right whale  | 22 August 1961   | Collected by the Whale Research Institute, south of Kodiak Island, Gulf of Alaska                                | 16               |
| USNM 504257            | <i>Eubalaena glacialis</i>        | Atlantic right whale | 11 May 1975      | Collected from a beached whale carcass by JG. Mead (SI) on Monomoy Is, Massachusetts                             | 19               |
| USNM 504343            | <i>Eubalaena glacialis</i>        | Atlantic right whale | 15 April 1976    | Collected from a whale carcass by JG. Mead (SI) off Duck Harbor, Wellfleet, Massachusetts                        | 17               |
| USNM 571336            | <i>Balaena mysticetus</i>         | Bowhead whale        | 1988             | Collected by Richard.Lambertsen, Arctic Ocean, Alaska                                                            | 11               |
| USNM 571337            | <i>Balaena mysticetus</i>         | Bowhead whale        | 1988             | Collected by Richard.Lambertsen, Arctic Ocean, Alaska                                                            | 15               |
| USNM 571338            | <i>Balaena mysticetus</i>         | Bowhead whale        | May 1987         | Collected by Richard.Lambertsen, Barrow, Arctic Ocean, Alaska                                                    | 9                |
| Balaenopteridae family |                                   |                      |                  |                                                                                                                  |                  |
| USNM 239307            | <i>Balaenoptera brydei/edeni</i>  | Bryde's whale        | 18 March 1923    | Collected by AJ Poole & CE. Mirquet from a whale carcass at Walnut point, Virginia                               | 15               |
| USNM 504074            | <i>Balaenoptera brydei/edeni</i>  | Bryde's whale        | 30 May 1974      | Collected by Barry Peers from a stranding carcass, Tarpon Springs Gulf of Mexico, Florida                        | 16               |
| USNM 504688            | <i>Balaenoptera brydei/edeni</i>  | Bryde's whale        | 5 January 1975   | Collected by T.J. McIntyre (SI), during Japanese whaling, East of South Island of New Zealand                    | 14               |
| USNM 504689            | <i>Balaenoptera brydei/edeni</i>  | Bryde's whale        | 5 January 1975   | Collected by T.J. McIntyre (SI), during Japanese whaling, East of South Island of New Zealand                    | 23               |
| USNM 486174            | <i>Balaenoptera borealis</i>      | Sei whale            | 10 December 1972 | Collected from a whale carcass by JG. Mead (SI) on north end of Cape Island, Charleston, South Carolina          | 4                |
| USNM 504244            | <i>Balaenoptera borealis</i>      | Sei whale            | 16 April 1975    | Collected from a whale carcass by JG. Mead (SI) at Corolla, North Carolina                                       | 7                |
| USNM 504706            | <i>Balaenoptera borealis</i>      | Sei whale            | 14 February 1975 | Collected by T.J. McIntyre (SI), during Japanese whaling, in Bransfield Strait, Antarctica, South Atlantic Ocean | 11               |
| USNM 504998            | <i>Balaenoptera borealis</i>      | Sei whale            | 12 July 1974     | Collected at La Costa De Buen Hombre, Dominic Republic                                                           | 18               |
| 269541                 | <i>Balaenoptera musculus</i>      | Blue whale           | No record        |                                                                                                                  | 12               |
| USNM 302977            | <i>Balaenoptera musculus</i>      | Blue whale           | NA               | Gift from Russian whaling ship                                                                                   | 14               |
| USNM 504996            | <i>Balaenoptera musculus</i>      | Blue whale           | 1970s            | Collected by ED. Mitchell 's team from a stranded whale, West coast of Newfoundland                              | 11               |
| USNM 239305            | <i>Balaenoptera acutorostrata</i> | Minke whale          | July 1922        | Collected by EP. Walker (SI), Pearl Island, Pribilof Islands, Alaska                                             | 17               |
| USNM 275769            | <i>Balaenoptera physalus</i>      | Fin whale            | 30 August 1947   | Collected by RM. Gilmore at Eureka, Del Norte, California                                                        | 4                |
| USNM 504258            | <i>Balaenoptera physalus</i>      | Fin whale            | 27 May 1975      | Collected from a whale carcass by JG. Mead (SI) in Brigantine, New Jersey                                        | 9                |
| USNM 504712            | <i>Balaenoptera physalus</i>      | Fin whale            | 13 March 1975    | Collected by T.J. McIntyre (SI), during Japanese whaling, Antarctica, South Pacific Ocean                        | 6                |
| USNM 16252             | <i>Megaptera novaeangliae</i>     | Humpback whale       | 12 April 1879    | Collected by EE. Small & Capt. NE. Atwood (SI) from a stranded whale in Provincetown, Massachusetts              | 10               |
| USNM 267999            | <i>Megaptera novaeangliae</i>     | Humpback whale       | 24 August 1938   | Baleen collected from a seized whale from the whaling ship Frango by Lt. TR Midtlyng in Western Australia        | 16               |
| USNM 504216            | <i>Megaptera novaeangliae</i>     | Humpback whale       | 29 February 1975 | Collected from a whale carcass by JG. Mead (SI) at Virginia Beach, Virginia                                      | 16               |
| Eschrichtiidae family  |                                   |                      |                  |                                                                                                                  |                  |

(Continued)



Table 1. (Continued)

| Accession # | Scientific name              | Common name | Collection date | Collection location                                                                           | Mass tested (mg) |
|-------------|------------------------------|-------------|-----------------|-----------------------------------------------------------------------------------------------|------------------|
| USNM 504999 | <i>Eschrichtius robustus</i> | Gray whale  | 15 January 1968 | Collected by RL. Delong at Del Monte whaling station at Richmond, California                  | 11               |
| USNM 572613 | <i>Eschrichtius robustus</i> | Gray whale  | 3 January 1967  | Collected by FM. Greenwell (SI) from the Del Monte Fishing Company, San Francisco, California | 8                |
| USNM 572614 | <i>Eschrichtius robustus</i> | Gray whale  | Jan. 1967       | Collected by FM. Greenwell (SI) possibly from Point Reyes, California                         | 12               |
| Unknown     |                              |             |                 |                                                                                               |                  |
| 339         | Unknown                      |             | No record       | Likely collected in New Zealand                                                               | 10               |

<https://doi.org/10.1371/journal.pone.0183053.t001>

## Results

### Markers of identification in fresh baleen

The species analyzed here have common peptides (Table 2 and in Fig 4 indicated with white-filled diamonds). The sequences of these peptides were previously identified [70] and have matches in the few publically available keratin sequences from the minke whale (Table 2). In particular, the peptide LNVEVDAAPTEDLNR appears to be specific to all Mysticeti whales only (Blast search against all organisms, timestamp December 2016). A few additional sequences were determined manually from MALDI-TOF-MS/MS spectra (Table 2 and S4 File). These sequences were used to re-calibrate internally the spectra for an error of less than 0.02 Da after calibration. Peaks that fell within this error tolerance are indicated in Table 3.

Balaenidae (North Atlantic and North Pacific right whales, and bowhead whale) have common peaks that differentiate them from the other baleen species (in light green Table 3). In addition, the right whales are characterized by a peak at  $m/z$  1541.64 while the presence in the bowhead whale of a peak at  $m/z$  1843.95 (and absence of  $m/z$  1857.99, Table 2) allows distinction from the right whales. A peak at  $m/z$  2204.02 was found in the North Atlantic right whale only (Fig 4a).

The Balaenopteridae (Bryde's, sei, blue, minke, fin and humpback whales) and Eschrichtiidae (gray whale) species are characterized by one common peak, at  $m/z$  1028.57 (sequence in Table 2). The peak at  $m/z$  2517.33 (sequence in Table 2) also indicates a species from these families, but was absent in two of the Bryde's whale specimens tested (see below). Bryde's and sei whales, two species genetically close, have a few common peaks (light blue Table 3), but sei whale has the highest occurrence of specific peaks of all species (dark blue Table 3 and Fig 4b). Blue and minke whales have one common peak at  $m/z$  1779.82 but can be differentiated by the presence of the peaks at  $m/z$  1950.99 and  $m/z$  2184.15 (sequence in Table 2) in the minke whale, and  $m/z$  1818.89 in the blue whale. Fin and humpback whales have four common peaks (light blue Table 3), but are differentiated from each other by the peak at  $m/z$  1425.65 in the fin whale, and four specific peaks in the humpback whale (dark blue in Table 3 and Fig 4c). Finally gray whale can also easily be differentiated by the presence of four specific peaks (in red Table 3 and Fig 4d). Reference mass spectra are given in S4 File for each species (raw data in S1 Data).

### Identification of the Bryde's whales

The Bryde's whale samples analyzed here come from two different geographical areas, the North Atlantic Ocean for specimens 239307 and 504074 and the South Pacific Ocean for specimens 504688 and 504689. They are characterized by the specific peaks at  $m/z$  1532.58, 1549.62

**Table 2. Sequences used for recalibration, with calculated *m/z* (C indicates Carbamidomethylation of the cysteine) and matched species: (i) Mysticeti species where peaks are observed with  $\leq 0.02$  Da error; and (ii) species matched by sequence homology using Blast (<https://blast.ncbi.nlm.nih.gov>).**

| Sequence                             | <i>m/z</i> | Protein references <sup>a</sup> | Species (i)                       | Other matches (ii)                 |
|--------------------------------------|------------|---------------------------------|-----------------------------------|------------------------------------|
| GITGGFGSR                            | 851.44     | Hb1, Hb6                        | All                               | shrew, mole, squirrel <sup>c</sup> |
| WQFYQNR                              | 1041.49    | Hb1, Hb3, Hb5, Hb6              | All                               | > 10 species                       |
| DVEEWFTR                             | 1081.50    | Ha1, Ha3                        | All                               | goat, sheep, antelope <sup>d</sup> |
| LGLDIEIATYR                          | 1263.70    | Hb1, Hb5, Hb6                   | All                               | > 10 species                       |
| LNVEVDAAPTEDLNR                      | 1655.82    | Ha1, Ha3, Ha6                   | All                               | -                                  |
| TVNALEIELQAQHSR                      | 1839.94    | Ha6                             | All                               | > 10 species                       |
| TVHALEVELQAQHNLR                     | 1857.99    | Ha1, Ha3                        | All but bowhead whale             | Yangtze dolphin <sup>e</sup>       |
| SDLEANSEALIQEIDFLR                   | 2063.03    | Hb1, Hb3, Hb6                   | All                               | > 10 species                       |
| SQQQDPLVCPNYQSYFR                    | 2129.97    | Ha1, Ha6                        | All                               | sperm whale <sup>f</sup>           |
| VPYISSVPCAPAPQLSTQIR <sup>b</sup>    | 2184.15    | Ha6                             | Balaenidae, minke and gray whales | -                                  |
| VEAQLAEIR                            | 1028.57    | Ha1, Ha3                        | Balaenopteridae and gray whale    | > 10 species                       |
| YSSQLAQIQGLIGNVEAQLSEIR <sup>b</sup> | 2517.33    | Ha6                             | Balaenopteridae and gray whale    | -                                  |
| YSSQLAQIQGLISNVEAQLSEIR <sup>b</sup> | 2547.34    | De novo                         | Bryde's whales                    | -                                  |
| YTSQLAQIQCLISNVEAQLSEIR <sup>b</sup> | 2664.37    | De novo                         | Balaenidae                        | -                                  |
| APYISSVPCAPAPQLSTQIR <sup>b</sup>    | 2156.12    | De novo                         | Bryde's and sei whales            | -                                  |

<sup>a</sup>Accession numbers in NCBI are: XP\_007177676.1 keratin, type I cuticular Ha1-like [*B. acutorostrata scammonii*], XP\_007177675.1 keratin, type I cuticular Ha3-1 [*B. acutorostrata scammonii*], XP\_007177677.1 keratin, type I cuticular Ha6 [*B. acutorostrata scammonii*], XP\_007179861.1 keratin, type II microfibrillar, component 7C-like (Hb1) [*B. acutorostrata scammonii*], XP\_007174324.1 keratin, type II cuticular Hb3-like, partial [*B. acutorostrata scammonii*], XP\_007179462.1 keratin, type II cuticular Hb5 [*B. acutorostrata scammonii*], XP\_007179463.1 keratin, type II cuticular Hb6 [*B. acutorostrata scammonii*].

<sup>b</sup>Sequences verified by MALDI-TOF-MS/MS analysis (spectra shown in [S4 File](#)).

<sup>c</sup>thirteen-lined ground squirrel (*Ictidomys tridecemlineatus*), common or Eurasian shrew (*Sorex araneus*), star-nosed mole (*Condylura cristata*);

<sup>d</sup>domestic goat (*Capra hircus*), domestic sheep (*Ovis aries*), Tibetan antelope or chiru (*Pantholops hodgsonii*);

<sup>e</sup>Yangtze dolphin (*Lipotes vexillifer*);

<sup>f</sup>sperm whale (*Physeter catodon*).

<https://doi.org/10.1371/journal.pone.0183053.t002>

and 2547.34 (sequence in [Table 2](#)). However, the North Atlantic specimens ([Fig 5a](#)) present a peak at *m/z* 1844.73 (not to be confounded with the bowhead peak at *m/z* 1843.95), which is visible in very low intensity in the South Pacific specimen 504688 ([Fig 5b](#)) and totally absent from the South Pacific specimen 504689 ([Fig 5c](#)). In addition, peptide *m/z* 2517.33 is present in specimen 504688 but not in 504689 or 504074.

### Archaeological samples

All but two archaeological samples were matched to the bowhead whale reference PMF ([Fig 6a](#)) based on the presence of peaks at *m/z* 1025.52, 1425.65, 1514.64, 2664.37 (Balaenidae) and *m/z* 1843.95 (species-specific); a sample from Avayalik-1 is shown in [Fig 6b](#) (Ava18) and all other samples in [S3 File](#) (Table A and Figures A1 to A29). The samples from the Inuit site Johannes Point in Hebron cannot be matched to any species ([Fig 6c](#)). The profiles show patterns of degradation with loss of common peptides and new peaks likely originating from modifications to the polypeptide chains. While peaks at 1081 and 1655 ([Fig 6c](#)) are indicative of baleen, diagnostic peptides are absent, instead showing peaks at *m/z* 1218, 1791 and 1434. The same pattern of degradation seen at Johannes Point is reproduced in the Dorset Avayalik-1 samples 16 and 33 (Figures A4 and A14 in [S3 File](#)), in these samples however, the presence of

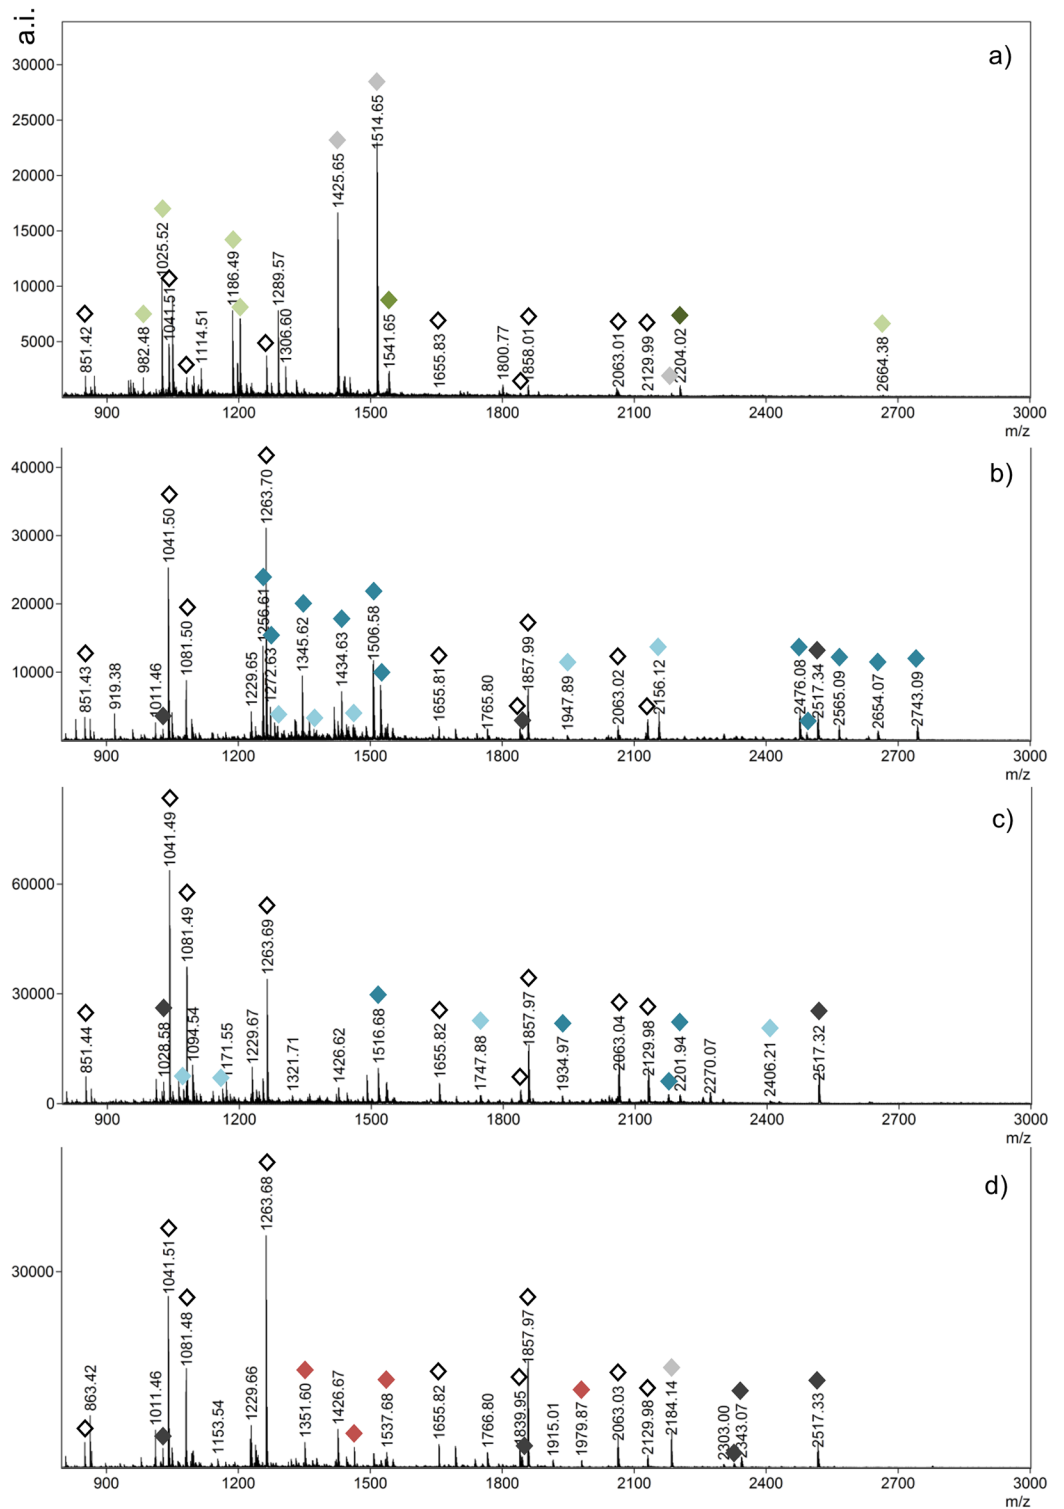

**Fig 4. Mass spectra of four baleen specimens with main markers indicated, see Table 3 for colour references a) North Atlantic right whale (*E. glacialis*) 504257; b) sei whale (*B. borealis*) 504998; c) humpback whale (*M. novaeangliae*) 267999 and d) gray whale (*E. robustus*) 572613.**

<https://doi.org/10.1371/journal.pone.0183053.g004>

**Table 3. Main diagnostic markers identified by peptide mass fingerprinting in Balaenidae (North Pacific (NP) right, North Atlantic (NA) right and bowhead whales), Balaenopteridae (Bryde's, sei, blue, minke, fin and humpback whales), and Eschrichtiidae (gray whale).** In gray and black are peaks found across families (in gray: all families and in black: Balaenopteridae and Eschrichtiidae), in green are balaenidae-only peaks (darker shade of green represents the right whales, and darkest green is for species-specific peaks), in blue are balaenopteridae-only peaks (darker shade of blue represents species-specific peaks), and in red are the eschrichtiidae-specific peaks. The—sign indicates the presence of a peak with relative intensity < 1%.

| m/z                 | NP Right* | NA Right | Bowhead | NA Bryde | SP Bryde (504689) | SP Bryde (504688) | Sei | Blue | Minke* | Fin | Humpback | Gray |
|---------------------|-----------|----------|---------|----------|-------------------|-------------------|-----|------|--------|-----|----------|------|
| 2184.15             |           |          |         |          |                   |                   |     |      |        |     |          |      |
| 1425.65             |           |          |         |          |                   |                   |     |      |        |     |          |      |
| 1514.64             |           |          |         |          |                   |                   |     |      |        |     |          |      |
| 1028.57             |           |          |         |          |                   |                   |     |      |        |     |          |      |
| 2517.33             |           |          |         |          |                   |                   |     |      |        |     |          |      |
| 1844.73             |           |          |         |          |                   |                   |     |      |        |     |          |      |
| 2326.04             |           |          |         |          |                   |                   |     |      |        |     |          |      |
| 2343.07             |           |          |         |          |                   |                   |     |      |        |     |          |      |
| 982.49              | -         |          |         |          |                   |                   |     |      |        |     |          |      |
| 1025.52             |           |          |         |          |                   |                   |     |      |        |     |          |      |
| 1186.49/<br>1203.50 |           |          |         |          |                   |                   |     |      |        |     |          |      |
| 2664.37             |           | -        |         |          |                   |                   |     |      |        |     |          |      |
| 1541.64             |           |          |         |          |                   |                   |     |      |        |     |          |      |
| 1843.95             |           |          |         |          |                   |                   |     |      |        |     |          |      |
| 2204.02             |           |          |         |          |                   |                   |     |      |        |     |          |      |
| 1282.63/<br>1298.64 |           |          |         |          |                   |                   |     |      |        |     |          |      |
| 1371.62             |           |          |         |          |                   |                   |     |      |        |     |          |      |
| 1460.63             |           |          |         |          |                   |                   |     |      |        |     |          |      |
| 1947.90             |           |          |         |          |                   |                   |     |      |        |     |          |      |
| 2156.12             |           |          |         |          |                   |                   |     |      |        |     |          |      |
| 1532.58/<br>1549.62 |           |          |         |          |                   |                   |     |      |        |     |          |      |
| 2547.34             |           |          |         |          |                   |                   |     |      |        |     |          |      |
| 1256.61/<br>1272.63 |           |          |         |          |                   |                   |     |      |        |     |          |      |
| 1345.62             |           |          |         |          |                   |                   |     |      |        |     |          |      |
| 1434.63             |           |          |         |          |                   |                   |     |      |        |     |          |      |
| 1506.58/<br>1523.62 |           |          |         |          |                   |                   |     |      |        |     |          |      |
| 2476.08/<br>2492.07 |           |          |         |          |                   |                   |     |      |        |     |          |      |
| 2565.09             |           |          |         |          |                   |                   |     |      |        |     |          |      |
| 2654.07             |           |          |         |          |                   |                   |     |      |        |     |          |      |
| 2743.09             |           |          |         |          |                   |                   |     |      |        |     |          |      |
| 1779.82             |           |          |         |          |                   |                   |     |      |        |     |          |      |
| 1818.89             |           |          |         |          |                   |                   |     |      |        |     |          |      |
| 1950.99             |           |          |         |          |                   |                   |     |      |        |     |          |      |
| 1073.52             |           |          |         |          |                   |                   |     |      |        |     |          |      |
| 1162.52             |           |          |         |          |                   |                   |     |      |        |     |          |      |
| 1747.88             |           |          |         |          |                   |                   |     |      |        |     |          |      |
| 2406.22             |           |          |         |          |                   |                   |     |      |        |     |          |      |
| 1516.68             |           |          |         |          |                   |                   |     |      |        |     |          |      |
| 1934.97             |           |          |         |          |                   |                   |     |      |        |     |          |      |

(Continued)

Table 3. (Continued)

| <i>m/z</i> | NP Right* | NA Right | Bowhead | NA Bryde | SP Bryde (504689) | SP Bryde (504688) | Sei | Blue | Minke* | Fin | Humpback | Gray |
|------------|-----------|----------|---------|----------|-------------------|-------------------|-----|------|--------|-----|----------|------|
| 2174.90    |           |          |         |          |                   |                   |     |      |        |     |          |      |
| 2201.95    |           |          |         |          |                   |                   |     |      |        |     |          |      |
| 1351.60    |           |          |         |          |                   |                   |     |      |        |     |          |      |
| 1463.71    |           |          |         |          |                   |                   |     |      |        |     |          |      |
| 1537.68    |           |          |         |          |                   |                   |     |      |        |     |          |      |
| 1979.87    |           |          |         |          |                   |                   |     |      |        |     |          |      |

\*Species for which only one specimen was available.

\*\*Observed in the specimen 267999 from Western Australia (might indicate a local form of humpback whale) and in the unidentified New Zealand sample B339 (S2 File) as a low intensity peak

<https://doi.org/10.1371/journal.pone.0183053.t003>

the *m/z* 1025.5 peptide points to either the right or bowhead whale, while the presence of a *m/z* 1844.1 peak, albeit at very low intensity, indicates a likely match to bowhead whale.

## Discussion

### Phylogeny of baleen whales

The divergence date of the Balaenidae from the other families has been estimated at 28 Ma [74, 75]. The phylogeny of the Balaenidae is well established with *B. mysticetus* (bowhead) split estimated between 5 and 10 Ma [75, 76] and much more recent divergence time for the Eubaleana (right whales) genus (less than a million year [75]). Our results are consistent with the ancient split of the Balaenidae family as right and bowhead whales have PMFs distinctive of the other baleen whales. While analyses of bone collagen have not been able to differentiate between bowhead and right whales using the ZooMS method [69], the analysis of baleen demonstrates a specific peak for the bowhead whale at *m/z* 1844, as well as distinct peaks for the right whale. These results allow distinction of bowhead and right whale in baleen, as well as indicating a possible separation of North Pacific and North Atlantic right whales. However, as only one specimen of the North Pacific right whale was available for testing, the absence of the peak at *m/z* 2204 in that species will have to be confirmed. These unexpected results also indicate the need to test baleen from the Southern Hemisphere right whale (*E. australis*) that has been accepted as a distinct species phylogenetically closer to the North Pacific right whale [77]. In modern times, whalers depleted right whales in the Northern Hemisphere causing the industry to pursue the right whale in the Southern Hemisphere. The possibility of distinguishing among the different species of right whales could be of great use to provenance baleen in historic objects. The pigmy right whale (*C. marginata*), so-called because of morphological similarities with the right whale, was not hunted commercially [78]; molecular data have now placed it with balaenopterids and eschrichtiids rather than with balaenids [79].

The phylogenetic relationships of the Eschrichtiidae and Balaenopteridae (last common ancestor estimated at 12–13 Ma [74, 75]) have been the subject of many studies as the morphological and molecular evidence have brought up different results [80]. Many studies have found fin and humpback whales to be sister taxa [75, 80–82] (split time 7 Ma [75]), as well as Bryde’s and sei whales [75, 80–83] (split time 3 Ma [75]). The high occurrence of common peptides between Bryde’s and sei whales and between fin and humpback whales are in line with the established relationships. Relationships are less clear for minke and blue whales: a study on Y chromosomes found minke whales to be close to the fin-humpback clade and the

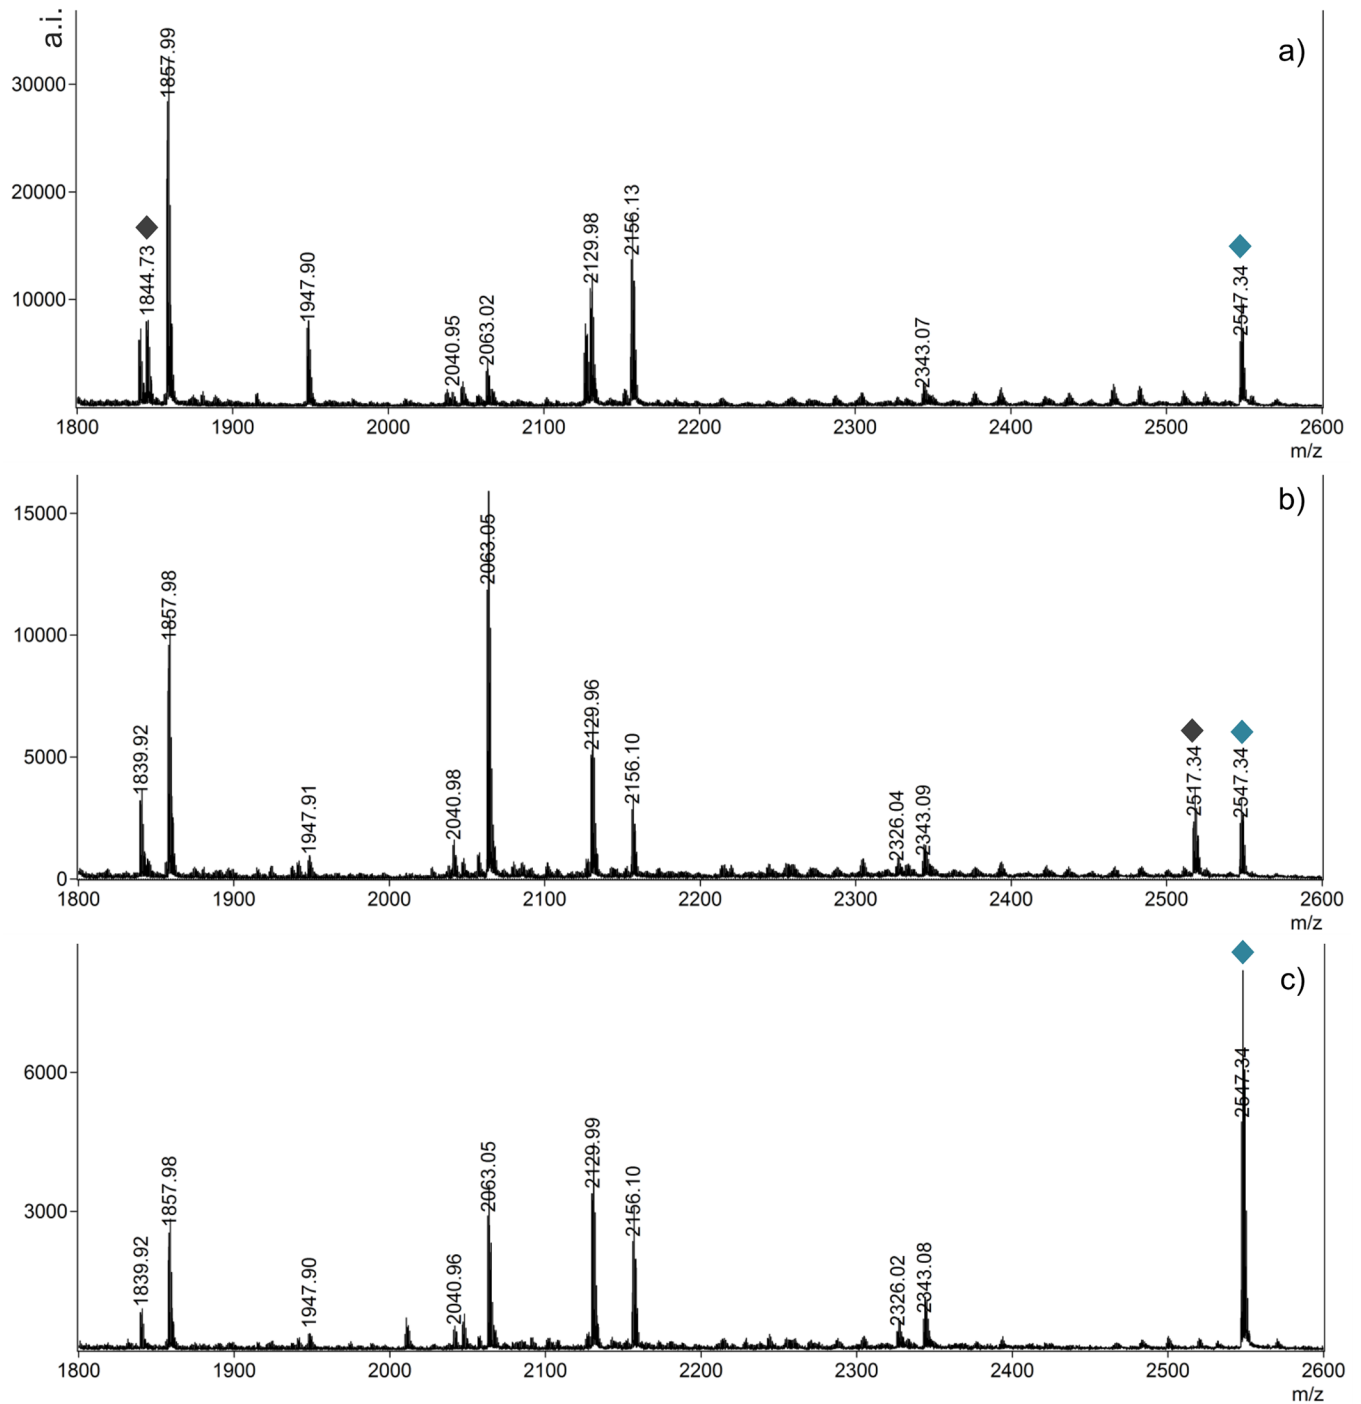

**Fig 5. Mass spectra between  $m/z$  1800–2600 of the Bryde's whales (*B. brydei*) showing subspecies markers a) North Atlantic specimen 504074; b) South Pacific specimen 504688; c) South Pacific specimen 504689.**

<https://doi.org/10.1371/journal.pone.0183053.g005>

blue whale branching from the other Eschrichtiidae/Balaenopteridae species [80]. One study placed the blue whale in a sister group of the fin-humpback clade based on mtDNA but found blue and fin to be sister taxa based on concatenated nuclear genes with minke as the closest relative [74]. Another placed the blue whale in a sister clade of the Bryde's/sei group and minke

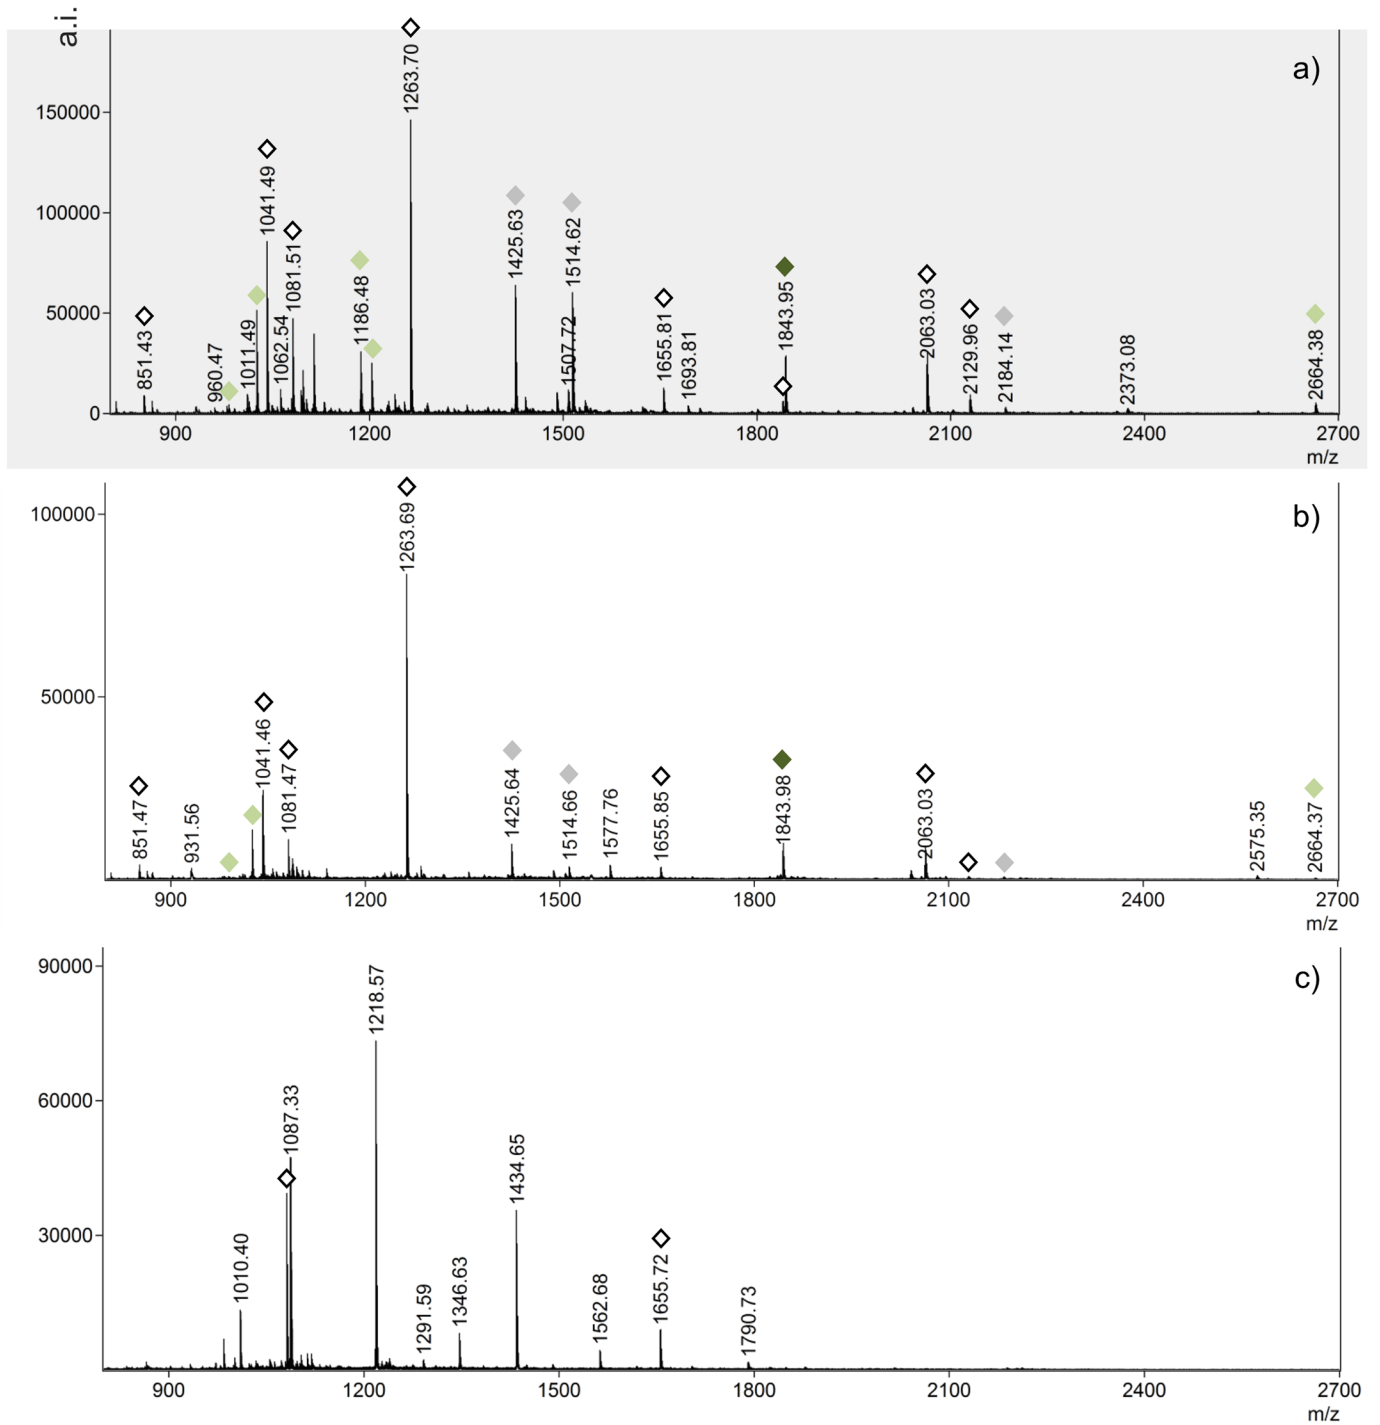

**Fig 6. PMF of a) bowhead whale sample 571338; b) archaeological baleen, Dorset (Ava18); c) degraded archaeological baleen, Inuit (Joh49).**

<https://doi.org/10.1371/journal.pone.0183053.g006>

whale branching out [82]. In Gatesy et al. (2013) [84], blue whale is placed next to the Bryde's/sei group as well as in McGowen et al. (2009) [75] which estimates a split date of 9 Ma. Our analyses so far found that minke and blue whales cannot be closely associated to any other species based on keratin markers from PMF; complete sequencing of the keratins would be needed to determine the phylogenetic placement of these species. In addition, only one specimen of minke whale was successfully tested. A second specimen of the common minke whale yielded no useable data (very degraded profile) and no Antarctic minke whale were tested here.

McGowen et al. [75] finds Eschrichtiidae (gray whale) to be most closely related to the fin-humpback clade with a divergence time from within the Balaenopteridae [81] at about 9 Ma [75]. Our PMF data indicate that keratin sequences are quite divergent between these three species, as no common diagnostic peptide markers were found among them.

## Bryde's whales

The taxonomy of the Bryde's whales, first described in South Africa in 1913 [85], has not been fully established due to the subsequent recognition of a morphologically similar species. Named *B. edeni* the new species, under which name all Bryde's whales have been classified, was first fully described after a Singapore specimen in 1950 [86]. Recently *B. brydei* and *B. edeni* have been recognized as separate species based on mtDNA [87, 88]. Sasaki refers to pelagic Bryde's whales (western North Pacific and eastern Indian Ocean) as belonging to *B. brydei* while specimens collected in Hong Kong, Japan and Australia are *B. edeni*, morphologically smaller than the *B. brydei* specimen. Several forms of *B. brydei* have been described, such as the offshore and inshore South African populations [89]. Bryde's whales also occur in the Pacific (Peru), the Atlantic (Brazil) and in New Zealand (*B. brydei* type) [90]. More recently, a smaller type of Bryde's whale was identified through specimens located in the western Pacific and eastern Indian Oceans. The specimens were first referred as pigmy Bryde's whales [91], but in 2003 they were recognized as belonging to a separate species named *B. omurai* that lies outside the Bryde's/sei clade [88].

Our analyses are consistent with the identification of two different species (*B. brydei* and *B. edeni*), or multiple sub-species. The lack of known morphological differentiation between the plates of *B. brydei* and *B. edeni* makes it difficult to associate any of our samples to a particular species. It is worth noting, however, that the North Atlantic specimens have thinner and denser bristles with a lighter coloration than the South Pacific specimens. In this regard, the three profiles observed for the Bryde's whales should be considered characteristic of any species or sub-species of Bryde's whales independent of their geographical origin. More specimens are needed to validate these results, in particular for the Southern Hemisphere samples that both yield different profiles. In addition, specimens of the Omura's whale should be tested to determine if its baleen profile is indeed different from the Bryde's and sei whales profiles and fit current genetic data.

## Baleen preservation

The vast majority of the modern baleen sampled from plates yielded good results, with only three specimens (not included here) failing to give useable PMFs. Those results are encouraging for they suggest that it is possible to identify the species of whale represented in historical baleen artefacts; the oldest specimen, a humpback whale from 1879, had a profile consistent with the younger humpback specimens. The archaeological samples also yielded good PMFs, with the exception of the samples from the Johannes Point Inuit site dating to the 17-19<sup>th</sup> centuries.



As mentioned earlier, keratinous tissues are generally more susceptible to biodegradation in archaeological sites than are bones; such rapid decomposition has been observed in all hard tissues made of alpha-keratins (horn, hoof, nail, claw) and beta-keratins (tortoiseshell) [41]. The protein analysis of degraded samples is often translated by the loss of diagnostic peaks: as the polypeptidic chain is degraded into smaller fragments through hydrolysis, PMFs are characterized by an increase of peptides of smaller molecular weight and decrease or complete loss of peptides at higher  $m/z$ . Further chemical degradation is usually observed with the deamidation of glutamine and asparagine, a frequent modification in archaeological hair for instance [68] and observed in the archaeological baleen samples to a small degree (Table B in [S3 File](#)). Deamidation, however, only results in small measurable shifts in peaks. The observation in the Johannes Point samples of unknown peaks, not observed in other baleen whale species and, to our knowledge not observed in hair samples or human contamination, likely results from other undetermined modifications to the peptides (such as truncated or semi-tryptic peptides).

The cold environment of the Arctic is undoubtedly a crucial factor for the preservation of baleen remains. Johannes Point, the southernmost of the sites sampled, is built on well-drained sands, lacks permafrost and has a protected southern exposure, meaning higher seasonal ambient temperatures and the greatest exposure to environmental degradation of the archaeological series. The samples from this site came from test pits that produced poorly-preserved faunal remains. The advanced chemical degradation of the samples was not obvious through visual examination when compared to baleen bristles with good protein preservation ([Fig 2](#)); this indicates that the biomolecular information preserved in baleen and by extension in bones is at risk due to exposure to a warm climate.

## Archaeological significance

In the time period covered by this study, several species of whales would have been found in the Labrador waters: the blue, sei, right, bowhead, humpback, minke, fin and gray whales. The North Atlantic population of gray whale went extinct around the early 1700s [92] and the Northwestern Atlantic population of right whale seems to have already been decimated by the time Basque whaling began in Newfoundland and Labrador in the 16th c. [93]. The identification of bowhead in nearly all samples is not necessarily an indication of the sole use of bowhead for baleen supplies. Several reasons can explain the absence of other species: 1) the modest sample size of the samples (29 samples), 2) the possibility that samples originate from the same animal (there are a few samples that come from the same location, Table A in [S3 File](#)), 3) preferential degradation of baleen in some species (the hydroxyapatite content might vary from species to species [42] and baleen with low mineral content would be more susceptible to degradation), and 4) a biased representation of baleen in archaeological sites (baleen is rarely preserved in other sites with more exposure, lacking permafrost deposits or at lower latitudes).

However, the dominance of bowhead whale remains in samples from Saqqaq, Dorset, Thule, and historic Inuit sites is consistent with past studies and probably results from two factors: bowhead accessibility and its highly desirable products. During the Dorset period, seal and walrus were the principal quarry. Dorset people lacked the technology suitable for hunting large whales, including floats and other specialized open-water whaling technology, but their carving of whale bone to make sled runners and tool handles, and use of baleen lashings suggests a consistent pattern of scavenging materials from bowheads that died of natural causes and drifted ashore. Eighteenth century's Moravian records document extensive use of 'drift whales' by Labrador Inuit [94] and we can expect Dorset people made similar use of buoyant

bowheads. Furthermore, recent bowhead DNA evidence from Greenland Saqqaq sites dating to 4000 B.P. [29] shows this species was used by the first Paleo-Inuit arrivals from Alaska and the wider North Pacific region, where, we may expect, scavenging and, later, hunting of large whales probably originated during early/mid-Holocene times.

The Thule specialized in subsistence hunting large whales in open water [72]. Their pursuit of bowheads was possible because of their specialized harpoon, float, and boat technology. This slow-swimming species played a central role in their western Arctic-derived whaling adaptation. Whale meat, blubber, and skin provided vital nutrition to their communities and their dog teams. Whale bones were used as architectural elements in dwellings and were carved into tools and weapons, blubber was used in lamps to light house interiors and cook food, and baleen was used to make hunting, fishing, traveling and household implements. The social organization and ideology of a community centered around whale-boat crews and whales. None of the other large whales could be approached and killed as easily as bowheads. Its continued importance in later historic Alaska, Labrador and Greenland Inuit society can be attributed to the same factors: ease of capture and abundant raw materials and food resources. In the 1600s, trade between Europeans and northern Labrador Inuit communities was initiated and intensified in the 1700s [72]: baleen, sealskins, and down were exchanged for European-derived raw materials (hardwoods, metals) and manufactured commodities [73]. After the 1800s, however, large whales became rare in Labrador due to over-exploitation by European and American whalers, and smaller, less predictable catches were reported [72].

## Conclusion

The identification of baleen species used in ancient artefacts can help archaeologists better understand what species prehistoric groups hunted and how the resources they provided were utilized. Historical records about catches are not numerous and are often incomplete. In addition, the reliability of whale identifications based on visual reports can be questionable. For instance, it is unclear from historic sightings whether bowhead or right whale was caught by North Atlantic whalers. In addition, the bowhead was until recently also called Greenland right whale [37, 95], adding to the confusion as to which species was effectively hunted. As a result of these problems, using historical records to make estimates of the size of pre-European whaling whale stock numbers is fraught with problems.

Turning to biomolecular analysis of whale remains is one way to improve our knowledge of past whaling activity and will add important information about the prehistoric and historic availability of the Mysticeti whales. Peptide mass fingerprinting of baleen offers a new analytical tool to identify baleen specimens or baleen-made artefacts: sample sizes can be reduced to a few mg and baleen sourced from artefacts in both prehistoric and historic collections. We demonstrate here that identification is possible at the species and possibly at the sub-species level, with additional well-characterized specimens necessary to look for differences at the sub-species level. The data indicate a higher level of differentiation in baleen PMFs than in mammal hair. In hair for instance, only one peptide can be reliably used to differentiate sheep from goat, two species that belong to distinct genera [70]; here, species from the same genus have distinguishable profiles. The extent of the divergence of the whale keratins will however only be possible once sequence information for all baleen whales is known (number of alpha-keratin proteins, amino-acid sequences, intraspecies variations).

Peptide fingerprinting is an interesting alternative to DNA barcoding to identify taxa, and has many applications, from archaeology to wildlife forensics [61]. There is a wide range of keratinous tissues (hair, horn, feathers, tortoiseshell) and organisms on which the

methodology can be applied to provide a fast and easy taxonomic identification that will complement or offer a substitute technique when degradation prevents identification by microscopy or DNA.

## Supporting information

### **S1 File. Baleen whales.**

(PDF)

### **S2 File. Baleen sample B339.**

(PDF)

### **S3 File. Archaeological materials from Labrador.**

(PDF)

### **S4 File. Mass spectra of reference materials.**

(PDF)

### **S1 Data. MALDI-TOF raw files.**

(ZIP)

## Acknowledgments

The archaeological baleen samples were collected by Susan Kaplan. Excavation permits in 1977–78 were obtained thanks to the Canadian History Museum (then called National Museum of Man) and the Provincial Archaeology Office of the Government of Newfoundland and Labrador. Finally the analytical work was supported by a Burch Fellowship in Theoretical Medicine and Affiliated Sciences (Smithsonian Institution).

## Author Contributions

**Conceptualization:** Caroline Solazzo.

**Formal analysis:** Caroline Solazzo.

**Funding acquisition:** Caroline Solazzo.

**Investigation:** Caroline Solazzo, William Fitzhugh.

**Methodology:** Caroline Solazzo.

**Project administration:** Caroline Solazzo.

**Resources:** William Fitzhugh, Susan Kaplan, Charles Potter.

**Supervision:** Jolon M. Dyer.

**Validation:** William Fitzhugh, Susan Kaplan.

**Writing – original draft:** Caroline Solazzo, William Fitzhugh.

**Writing – review & editing:** Susan Kaplan, Charles Potter, Jolon M. Dyer.

## References

1. Wandeler P, Hoeck PEA, Keller LF. Back to the future: museum specimens in population genetics. *Trends Ecol Evol.* 2007; 22(12):634–42. <http://dx.doi.org/10.1016/j.tree.2007.08.017>. PMID: 17988758
2. Buerki S, Baker WJ. Collections-based research in the genomic era. *Biol J Linn Soc Lond.* 2016; 117(1):5–10. <https://doi.org/10.1111/bij.12721>

3. Holmes MW, Hammond TT, Wogan GOU, Walsh RE, LaBarbera K, Wommack EA, et al. Natural history collections as windows on evolutionary processes. *Mol Ecol*. 2016; 25(4):864–81. <https://doi.org/10.1111/mec.13529> PMID: 26757135
4. Bi K, Linderoth T, Vanderpool D, Good JM, Nielsen R, Moritz C. Unlocking the vault: next-generation museum population genomics. *Mol Ecol*. 2013; 22(24):6018–32. <https://doi.org/10.1111/mec.12516> PMID: 24118668
5. Guschanski K, Krause J, Sawyer S, Valente LM, Bailey S, Finstermeier K, et al. Next-Generation Museum Genomics Disentangles One of the Largest Primate Radiations. *Syst Zool*. 2013; 62(4):539–54. <https://doi.org/10.1093/sysbio/syt018> PMID: 23503595
6. Nachman MW. Genomics and museum specimens. *Mol Ecol*. 2013; 22(24):5966–8. <https://doi.org/10.1111/mec.12563> PMID: 24138088
7. Casas-Marce M, Revilla E, Godoy JA. Searching for DNA in museum specimens: a comparison of sources in a mammal species. *Mol Ecol Resour*. 2010; 10(3):502–7. <https://doi.org/10.1111/j.1755-0998.2009.02784.x> PMID: 21565049
8. Morin PA, McCarthy M. Highly accurate SNP genotyping from historical and low-quality samples. *Mol Ecol Notes*. 2007; 7(6):937–46. <https://doi.org/10.1111/j.1471-8286.2007.01804.x>
9. Rosenbaum HC, Egan MG, Clapham PJ, Brownell RL, Malik S, Brown MW, et al. Utility of North Atlantic Right Whale Museum Specimens for Assessing Changes in Genetic Diversity. *Conserv Biol*. 2000; 14(6):1837–42. <https://doi.org/10.1111/j.1523-1739.2000.99310.x>
10. Kimura T, Ozawa T, Pastene LA. Sample preparation and analysis of mitochondrial dna from whale baleen plates. *Mar Mamm Sci*. 1997; 13(3):495–8. <https://doi.org/10.1111/j.1748-7692.1997.tb00657.x>
11. Eastop D, McEwing R. Informing textile and wildlife conservation: DNA analysis of baleen from an 18th-century garment found deliberately concealed in a building. In: Janaway R, Wyeth P, editors. *Scientific analysis of ancient and historic textiles*, AHRC Research Centre for Textile Conservation and Textile Studies: first annual conference, 13–15 July 2004. London: Archetype; 2005. p. 161–7.
12. Sinding M-HS, Gilbert MTP, Grønnow B, Gulløv HC, Toft PA, Foote AD. Minimally destructive DNA extraction from archaeological artefacts made from whale baleen. *J Archaeol Sci*. 2012; 39(12):3750–3. <http://dx.doi.org/10.1016/j.jas.2012.06.020>.
13. Sinding M-HS, Tervo OM, Grønnow B, Gulløv HC, Toft PA, Bachmann L, et al. Sex determination of baleen whale artefacts: Implications for ancient DNA use in zooarchaeology. *J Archaeol Sci Rep*. 2016; 10:345–9. <http://dx.doi.org/10.1016/j.jasrep.2016.11.001>.
14. Morin PA, Hedrick NM, Robertson KM, Leduc CA. Comparative mitochondrial and nuclear quantitative PCR of historical marine mammal tissue, bone, baleen, and tooth samples. *Mol Ecol Notes*. 2007; 7(3):404–11. <https://doi.org/10.1111/j.1471-8286.2007.01699.x>
15. Young S, Deméré TA, Ekdale EG, Berta A, Zellmer N. Morphometrics and Structure of Complete Baleen Racks in Gray Whales (*Eschrichtius robustus*) From the Eastern North Pacific Ocean. *Anat Rec*. 2015; 298(4):703–19. <https://doi.org/10.1002/ar.23108> PMID: 25737029
16. Young S. *The comparative anatomy of baleen: evolutionary and ecological implications*. San Diego State University; 2012.
17. Fudge DS, Szewciw LJ, Schwalb AN. Morphology and Development of Blue Whale Baleen: An Annotated Translation of Tycho Tullberg's Classic 1883 Paper. *Aquat Mamm*. 2009; 35(2):226–52.
18. Hunt KE, Lysiak NS, Moore MJ, Rolland RM. Longitudinal progesterone profiles in baleen from female North Atlantic right whales (*Eubalaena glacialis*) match known calving history. *Conserv Physiol*. 2016; 4(1):cow014. <https://doi.org/10.1093/conphys/cow014> PMID: 27293762
19. Hunt KE, Stimmelmayer R, George C, Hanns C, Suydam R, Brower H, et al. Baleen hormones: a novel tool for retrospective assessment of stress and reproduction in bowhead whales (*Balaena mysticetus*). *Conserv Physiol*. 2014; 2(1). <https://doi.org/10.1093/conphys/cou030> PMID: 27293651
20. Bentaleb I, Martin C, Vrac M, Mate B, Mayzaud P, Siret D, et al. Foraging ecology of Mediterranean fin whales in a changing environment elucidated by satellite—tracking and baleen plate stable isotopes. *Marine Ecology Progress Series*. 2011; 438:285–302.
21. Reeves RR. The origins and character of 'aboriginal subsistence' whaling: a global review. *Mammal Review*. 2002; 32(2):71–106. <https://doi.org/10.1046/j.1365-2907.2002.00100.x>
22. Reeves RR, Smith TD. *A Taxonomy of World Whaling*. In: Estes JA, editor. *Whales, whaling, and ocean ecosystems*. Berkeley: University of California Press; 2006. p. 82–101.
23. Barnes RH. Lamalerap: A Whaling Village in Eastern Indonesia. *Indonesia*. 1974;(17):137–59. <https://doi.org/10.2307/3350777>
24. Yamamura K. The Sea Mammal Hunting Cultures of the Okhotsk Sea with Special Reference to Hokkaido Prehistory. *Arctic Anthropology*. 1998; 35(1):321–34.

25. Lindquist O. Whales, dolphins and porpoises in the economy and culture of peasant fishermen in Norway, Orkney, Shetland, Faroe Islands and Iceland, ca.900–1900 A.D., and Norse Greenland, ca. 1000–1500 A.D. Scotland: University of St. Andrews; 1994.
26. McCartney AP, editor History of Native whaling in the Arctic and Subarctic. Arctic whaling: Proceedings of the International Symposium Arctic Whaling, February 1983 1984; Netherland: Arctic Centre, University of Groningen.
27. McMillan AD. Whales and Whalers in Nuuk-Whaling Archaeology. *BC Studies*. 2015; 187:229–61.
28. Yesner DR. Origins and Development of Maritime Adaptations in the Northwest Pacific Region of North America: A Zooarchaeological Perspective. *Arctic Anthropology*. 1998; 35(1):204–22.
29. Seersholm FV, Pedersen MW, Sørensen MJ, Shokry H, Mak SST, Ruter A, et al. DNA evidence of bowhead whale exploitation by Greenlandic Paleo-Inuit 4,000 years ago. *Nature Communications*. 2016; 7:13389. <https://doi.org/10.1038/ncomms13389> PMID: 27824339
30. Jordan RH. Preliminary Results from Archaeological Investigations on Avayalik Island, Extreme Northern Labrador. *Arctic*. 1980; 33(3):607–27.
31. Lauffenburger JA. Baleen in museum collections: its sources, uses, and identification. *J Am Inst Conserv*. 1993; 32(3):213–30.
32. Lee M. Baleen basketry of the North Alaskan Eskimo. Seattle, WA: University of Washington Press; 1998.
33. Omura H. History of Right Whale Catches in the Waters around Japan. In: Brownell Jr RL, Best PB, Prescott JH, editors. Right Whales: Past and Present Status Report of the International Whaling Commission. 10. Cambridge: International Whaling Commission; 1986. p. 35–41.
34. Gardiner M. The Exploitation of Sea-Mammals in Medieval England: Bones and their Social Context. *Archaeological Journal*. 1997; 154(1):173–95. <https://doi.org/10.1080/00665983.1997.11078787>
35. Mulville J. The role of cetacea in prehistoric and historic Atlantic Scotland. *International Journal of Osteoarchaeology*. 2002; 12(1):34–48. <https://doi.org/10.1002/oa.611>
36. Buckley M, Fraser S, Herman J, Melton ND, Mulville J, Pálsson AH. Species identification of archaeological marine mammals using collagen fingerprinting. *J Archaeol Sci*. 2014; 41:631–41.
37. Clark G. Whales as an Economic Factor in Prehistoric Europe. *Antiquity*. 1947; 21(82):84–104. Epub 2015/01/02. <https://doi.org/10.1017/s0003598x00016513>
38. Evans S, Briz i Godino I, Álvarez M, Rowsell K, Collier P, de Goodall RNP, et al. Using combined biomolecular methods to explore whale exploitation and social aggregation in hunter–gatherer–fisher society in Tierra del Fuego. *J Archaeol Sci Rep*. 2016; 6:757–67. <http://dx.doi.org/10.1016/j.jasrep.2015.10.025>.
39. Cunliffe EA. Whales and Whale Bone Technology in New Zealand Prehistory University of Otago: University of Otago; 2014.
40. Cunliffe EA, Brooks E. Prehistoric Whale Bone Technology in Southern New Zealand. *International Journal of Osteoarchaeology*. 2016; 26(3):384–96. <https://doi.org/10.1002/oa.2427>
41. O'Connor S, Solazzo C, Collins M. Advances in identifying archaeological traces of horn and other keratinous hard tissues. *Stud Conserv*. 2015; 60(6):393–417. <https://doi.org/10.1179/2047058414y.0000000134>
42. Szewciw LJ, de Kerckhove DG, Grime GW, Fudge DS. Calcification provides mechanical reinforcement to whale baleen  $\alpha$ -keratin. *Proceedings of the Royal Society of London B: Biological Sciences*. 2010; 277(1694):2597–605. <https://doi.org/10.1098/rspb.2010.0399> PMID: 20392736
43. Rijkkelijkhuizen M. Whales, Walruses, and Elephants: Artisans in Ivory, Baleen, and Other Skeletal Materials in Seventeenth- and Eighteenth-Century Amsterdam. *Int J Hist Archaeol*. 2009; 13(4): 409–29. <https://doi.org/10.1007/s10761-009-0091-0>
44. McCartney AP, Savelle JM. Bowhead whale bones and Thule Eskimo subsistence–settlement patterns in the central Canadian Arctic. *Polar Rec*. 1993; 29(168):1–12. <https://doi.org/10.1017/S0032247400023160>
45. Whitridge P. Social and ritual determinants of whale bone transport at a classic Thule winter site in the Canadian Arctic. *Int J Osteoarchaeol*. 2002; 12(1):65–75. <https://doi.org/10.1002/oa.613>
46. Coltrain JB, Hayes MG, O'Rourke DH. Sealing, whaling and caribou: the skeletal isotope chemistry of Eastern Arctic foragers. *J Archaeol Sci*. 2004; 31(1):39–57.
47. Savelle JM. The Role of Architectural Utility in the Formation of Zooarchaeological Whale Bone Assemblages. *Journal of Archaeological Science*. 1997; 24(10):869–85.
48. Monks GG, McMillan AD, St. Claire DE. Nuuk-Whaling: Archaeological Insights into Antiquity, Species Preferences, and Cultural Importance. *Arctic Anthropol*. 2001; 38(1):60–81.

49. Monks GG. Quit blubbering: an examination of Nuu'chah'nulth (Nootkan) whale butchery. *Int J Osteoarchaeol*. 2001; 11(1–2):136–49. <https://doi.org/10.1002/oa.552>
50. Scarff JE. Historic and Present Distribution of the Right Whale (*Eubalaena glacialis*) in the Eastern North Pacific South of 50° N and East of 180° W. In: Brownell Jr RL, Best PB, Prescott JH, editors. *Right Whales: Past and Present Status Report of the International Whaling Commission*. 10. Cambridge: International Whaling Commission; 1986. p. 43–63.
51. Wellman HP, Rick TC, Rodrigues AT, Yang DY. Evaluating Ancient Whale Exploitation on the Northern Oregon Coast Through Ancient DNA and Zooarchaeological Analysis. *JICA*. 2016:1–21. <https://doi.org/10.1080/15564894.2016.1172382>
52. Berta A, Sumich JL, Kovacs KM. *Marine mammals. Evolutionary biology*. Third Edition. Press A, editor. London: Academic Press; 2015.
53. Aguilar A. A review of old Basque whaling and its effect on the right whales of the North Atlantic. In: Brownell Jr RL, Best PB, Prescott JH, editors. *Right Whales: Past and Present Status Report of the International Whaling Commission*. 10. Cambridge: International Whaling Commission; 1986. p. 191–9.
54. Cumbaa SL. Archaeological evidence of the 16th century Basque right whale fishery in Labrador. In: Brownell Jr RL, Best PB, Prescott JH, editors. *Right Whales: Past and Present Status Report of the International Whaling Commission*. 10. Cambridge: International Whaling Commission; 1986. p. 187–90.
55. Barkham SH. The Basque Whaling Establishments in Labrador 1536–1632—A Summary. *Arctic*. 1984; 37(4):515–9. Epub 1984-01-01. <https://doi.org/10.14430/arctic2232>
56. McLeod BA, Brown MW, Moore MJ, Stevens W, Barkham SH, Barkham M, et al. Bowhead Whales, and Not Right Whales, Were the Primary Target of 16<sup>th</sup>-to 17<sup>th</sup>-Century Basque Whalers in the Western North Atlantic. *Arctic*. 2008; 61(1):61–75.
57. Rastogi T, Brown MW, McLeod BA, Frasier TR, Grenier R, Cumbaa SL, et al. Genetic analysis of 16<sup>th</sup>-century whale bones prompts a revision of the impact of Basque whaling on right and bowhead whales in the western North Atlantic. *Can J Zool*. 2004; 82(10):1647–54. <https://doi.org/10.1139/z04-146>
58. Hebert PDN, Cywinska A, Ball SL, deWaard JR. Biological identifications through DNA barcodes. *Proc R Soc Lond B Biol Sci*. 2003; 270(1512):313–21. <https://doi.org/10.1098/rspb.2002.2218> PMID: 12614582
59. Hebert PDN, Gregory TR. The Promise of DNA Barcoding for Taxonomy. *Syst Biol*. 2005; 54(5):852–9. <https://doi.org/10.1080/10635150500354886> PMID: 16243770
60. Miller SE, Hausmann A, Hallwachs W, Janzen DH. Advancing taxonomy and bioinventories with DNA barcodes. *Philos Trans R Soc Lond B Biol Sci*. 2016; 371(1702). <https://doi.org/10.1098/rstb.2015.0339> PMID: 27481791
61. Galimberti A, Sandionigi A, Bruno A, Bellati A, Casiraghi M. DNA barcoding in mammals: what's new and where next? 2015. 2015; 26(1):12. Epub 2015-03-25. <https://doi.org/10.4404/hystrix-26.1-11347>
62. Meyer CP, Paulay G. DNA Barcoding: Error Rates Based on Comprehensive Sampling. *PLoS Biol*. 2005; 3(12):e422. <https://doi.org/10.1371/journal.pbio.0030422> PMID: 16336051
63. DeSalle R, Egan MG, Siddall M. The unholy trinity: taxonomy, species delimitation and DNA barcoding. *Philos Trans R Soc Lond B Biol Sci*. 2005; 360(1462):1905–16. <https://doi.org/10.1098/rstb.2005.1722> PMID: 16214748
64. Taylor HR, Harris WE. An emergent science on the brink of irrelevance: a review of the past 8 years of DNA barcoding. *Mol Ecol Resour*. 2012; 12(3):377–88. <https://doi.org/10.1111/j.1755-0998.2012.03119.x> PMID: 22356472
65. Collins RA, Cruickshank RH. The seven deadly sins of DNA barcoding. *Molecular Ecology Resources*. 2013; 13(6):969–75. <https://doi.org/10.1111/1755-0998.12046> PMID: 23280099
66. Buckley M. Ancient collagen reveals evolutionary history of the endemic South American 'ungulates'. *Proceedings of the Royal Society B: Biological Sciences*. 2015; 282(1806). <https://doi.org/10.1098/rspb.2014.2671> PMID: 25833851
67. Brandt LØ, Schmidt AL, Mannering U, Sarret M, Kelstrup CD, Olsen JV, et al. Species Identification of Archaeological Skin Objects from Danish Bogs: Comparison between Mass Spectrometry-Based Peptide Sequencing and Microscopy-Based Methods. *PLoS ONE*. 2014; 9(9):e106875. <https://doi.org/10.1371/journal.pone.0106875> PMID: 25260035
68. Solazzo C, Rogers PW, Weber L, Beaubien HF, Wilson J, Collins M. Species identification by peptide mass fingerprinting (PMF) in fibre products preserved by association with copper-alloy artefacts. *J Archaeol Sci*. 2014; 49:524–35. <https://doi.org/10.1016/j.jas.2014.06.009>
69. Speller C, van den Hurk Y, Charpentier A, Rodrigues A, Gardeisen A, Wilkens B, et al. Barcoding the largest animals on Earth: ongoing challenges and molecular solutions in the taxonomic identification of

- ancient cetaceans. *Philos Trans R Soc Lond B Biol Sci.* 2016; 371(1702). <https://doi.org/10.1098/rstb.2015.0332> PMID: 27481784
70. Solazzo C, Wadsley M, Dyer JM, Clerens S, Collins MJ, Plowman J. Characterisation of novel  $\alpha$ -keratin peptide markers for species identification in keratinous tissues using mass spectrometry. *Rapid Commun Mass Spectrom.* 2013; 27(23):2685–98. <https://doi.org/10.1002/rcm.6730> PMID: 24591030
  71. Fitzhugh W. Preliminary Report on the Torngat Archaeological Project. *Arctic.* 1980; 33(3):585–606.
  72. Kaplan SA. Neo-Eskimo Occupations of the Northern Labrador Coast. *Arctic.* 1980; 33(3):646–58.
  73. Loring S. The archaeology of Eskimo Hütte (IkDb-2): Inuit sovereignty in the Torngat. *Etud Inuit.* 1998; 22(2):53–76.
  74. Jackson JA, Baker CS, Vant M, Steel DJ, Medrano-González L, Palumbi SR. Big and Slow: Phylogenetic Estimates of Molecular Evolution in Baleen Whales (Suborder Mysticeti). *Mol Biol Evol.* 2009; 26(11):2427–40. <https://doi.org/10.1093/molbev/msp169> PMID: 19648466
  75. McGowen MR, Spaulding M, Gatesy J. Divergence date estimation and a comprehensive molecular tree of extant cetaceans. *Mol Phylogenet Evol.* 2009; 53(3):891–906. <https://doi.org/10.1016/j.ympev.2009.08.018> PMID: 19699809
  76. Marx FG, Fordyce RE. Baleen boom and bust: a synthesis of mysticete phylogeny, diversity and disparity. *R Soc Open Sci.* 2015; 2(4). <https://doi.org/10.1098/rsos.140434> PMID: 26064636
  77. Rosenbaum HC, Brownell RL, Brown MW, Schaeff C, Portway V, White BN, et al. World-wide genetic differentiation of *Eubalaena*: questioning the number of right whale species. *Mol Ecol.* 2000; 9(11):1793–802. PMID: 11091315
  78. Reilly SB, Bannister JL, Best PB, Brown M, Brownell RL Jr., Butterworth DS, et al. *Caperea marginata*. The IUCN Red List of Threatened Species 2008. <http://dx.doi.org/10.2305/IUCN.UK.2008.RLTS.T3778A10071743.en>.
  79. Fordyce RE, Marx FG. The pygmy right whale *Caperea marginata*: the last of the cetotheres. *Proc R Soc Lond B Biol Sci.* 2013; 280(1753). <https://doi.org/10.1098/rspb.2012.2645> PMID: 23256199
  80. Hatch LT, Dopman EB, Harrison RG. Phylogenetic relationships among the baleen whales based on maternally and paternally inherited characters. *Mol Phylogenet Evol.* 2006; 41(1):12–27. <https://doi.org/10.1016/j.ympev.2006.05.023> PMID: 16843014
  81. Agnarsson I, May-Collado LJ. The phylogeny of Cetartiodactyla: The importance of dense taxon sampling, missing data, and the remarkable promise of cytochrome b to provide reliable species-level phylogenies. *Mol Phylogenet Evol.* 2008; 48(3):964–85. <https://doi.org/10.1016/j.ympev.2008.05.046> PMID: 18590827
  82. Nishida S, Goto M, Pastene LA, Kanda N, Koike H. Phylogenetic Relationships Among Cetaceans Revealed by Y-Chromosome Sequences. *Zoolog Sci.* 2007; 24(7):723–32. <https://doi.org/10.2108/zsj.24.723> PMID: 17824780
  83. Rychel AL, Reeder TW, Berta A. Phylogeny of mysticete whales based on mitochondrial and nuclear data. *Mol Phylogenet Evol.* 2004; 32(3):892–901. <https://doi.org/10.1016/j.ympev.2004.02.020> PMID: 15288064
  84. Gatesy J, Geisler JH, Chang J, Buell C, Berta A, Meredith RW, et al. A phylogenetic blueprint for a modern whale. *Mol Phylogenet Evol.* 2013; 66(2):479–506. <https://doi.org/10.1016/j.ympev.2012.10.012> PMID: 23103570
  85. Olsen O. On the External Characters and Biology of Bryde's Whale *Balaenopectera brydei*, a new Rorqual from the Coast of South Africa. *Proc R Soc Lond B Biol Sci.* 1913; 83(4):1073–90. <https://doi.org/10.1111/j.1096-3642.1913.tb02005.x>
  86. Junge GCA. On a specimen of the rare fin whale, *Balaenopectera edeni* Anderson, stranded on Pulu Sugi near Singapore. *Zool Verhandl.* 1950; 9:3–26.
  87. Sasaki T, Nikaido M, Wada S, Yamada TK, Cao Y, Hasegawa M, et al. *Balaenopectera omurai* is a newly discovered baleen whale that represents an ancient evolutionary lineage. *Mol Phylogenet Evol.* 2006; 41(1):40–52. <https://doi.org/10.1016/j.ympev.2006.03.032> PMID: 16843687
  88. Wada S, Oishi M, Yamada TK. A newly discovered species of living baleen whale. *Nature.* 2003; 426(6964):278–81. <https://doi.org/10.1038/nature02103> PMID: 14628049
  89. Best PB. Distribution and population separation of Bryde's whale *Balaenopectera edeni* off southern Africa. *Mar Ecol Prog Ser.* 2001; 220:277–89.
  90. Wiseman N, Parsons S, Stockin KA, Baker CS. Seasonal occurrence and distribution of Bryde's whales in the Hauraki Gulf, New Zealand. *Mar Mamm Sci.* 2011; 27(4):E253–E67. <https://doi.org/10.1111/j.1748-7692.2010.00454.x>

91. Reilly SB, Bannister JL, Best PB, Brown M, Brownell RL Jr., Butterworth DS, et al. *Balaenoptera edeni*. The IUCN Red List of Threatened Species 2008. <http://dx.doi.org/10.2305/IUCN.UK.2008.RLTS.T2476A9445502.en>.
92. Reilly SB, Bannister JL, Best PB, Brown M, Brownell RL Jr., Butterworth DS, et al. *Eschrichtius robustus*. The IUCN Red List of Threatened Species 2008. <http://dx.doi.org/10.2305/IUCN.UK.2008.RLTS.T8097A12885255.en>.
93. Reeves RR, Breiwick JM, Mitchell ED. History of Whaling and Estimated Kill of Right Whales, *Balaena glacialis*, in the Northeastern United States, 1620–1924. *Marine Fisheries Review*. 1999; 61(3):1–36.
94. Taylor JG. Labrador Inuit Whale Use during the Early Contact Period. *Arctic Anthropol*. 1988; 25(1): 120–30.
95. Reilly SB, Bannister JL, Best PB, Brown M, Brownell RL Jr., Butterworth DS, et al. *Balaena mysticetus*. The IUCN Red List of Threatened Species 2012. <http://dx.doi.org/10.2305/IUCN.UK.2012.RLTS.T2467A17879018.en>.
